# 1 Large scale PVA modelling of insects in cultivated 2 grasslands: the role of dispersal in mitigating the effects 3 of management schedules under climate change

4 Johannes A. Leins<sup>a,\*</sup>, Martin Drechsler<sup>a,b</sup>

5

6 <sup>a</sup>Helmholtz Centre for Environmental Research – UFZ, Department of Ecological Modelling, Permoserstr. 15, 04318 Leipzig, Germany

7 <sup>b</sup>Brandenburg University of Technology Cottbus-Senftenberg, Platz der Deutschen Einheit 1, 03046 Cottbus, Germany

8 \*corresponding author (johannes.leins@ufz.de)

## 9 **Abstract**

10 In many species, dispersal is decisive for survival in a changing climate. Simulation models for  
11 population dynamics under climate change thus need to account for this factor. Moreover, large  
12 numbers of species inhabiting agricultural landscapes are subject to disturbances induced by human  
13 land use. We included dispersal in the HiLEG model that we previously developed to study the  
14 interaction between climate change and agricultural land use in single populations. Here, the model  
15 was parameterized for the large marsh grasshopper (LMG) in cultivated grasslands of North Germany  
16 to analyze (1) the species development and dispersal success depending on severity of climate  
17 change in sub regions, (2) the additional effect of grassland cover on dispersal success, and (3) the  
18 role of dispersal in compensating for detrimental grassland mowing. Our model simulated population  
19 dynamics in 60-year periods (2020-2079) on a fine temporal (daily) and high spatial (250 x 250 m<sup>2</sup>)  
20 scale in 107 sub regions, altogether encompassing a range of different grassland cover, climate  
21 change projections and mowing schedules. We show that climate change alone would allow the LMG  
22 to thrive and expand, while grassland cover played a minor role. Some mowing schedules that were  
23 harmful to the LMG nevertheless allowed the species to moderately expand its range. Especially  
24 under minor climate change, in many sub regions dispersal allowed for mowing early in the year,  
25 which is economically beneficial for farmers. More severe climate change could facilitate LMG  
26 expansion to uninhabited regions, but would require suitable mowing schedules along the path.  
27 These insights can be transferred to other species, given that the LMG is considered a representative  
28 of grassland communities. For more specific predictions on the dynamics of other species affected by  
29 climate change and land use, the publicly available HiLEG model can be easily adapted to the  
30 characteristics of their life cycle.

31 **KEYWORDS:** bilinear interpolation, climate change, dispersal success, land use, large marsh  
32 grasshopper, spatially explicit model

## 33 **1 Introduction**

34 The recent IPCC 2021 assessment report (Masson-Delmotte et al., in press) confirms that climate  
35 change poses a great threat to global biodiversity. In response to these developments, the  
36 distribution of species is expected to change (Van der Putten et al., 2010), potentially leading to  
37 increased extinction risk as ranges shrink or species must persist in new communities. Species

38 distribution models (SDMs) are therefore widely used to predict future distributions based on  
39 climate, habitat, and occurrence data (Srivastava et al., 2019). However, in fragmented and  
40 agricultural landscapes, extinction risk is at the same time severely affected by land use practices  
41 (Oliver and Morecroft, 2014). Accounting for these effects with SDMs, which are correlative by  
42 definition, is particularly difficult for insects that require a representation of their life cycle on a fine  
43 temporal scale. Here, the timing of anthropogenic processes such as management schedules relative  
44 to the species life stage can be critical for population viability (Leins et al. 2021).

45 Population Viability Analyses (PVA) using mechanistic models are an important complement to  
46 SDMs for estimating the risk of species loss in changing and disturbed environments (Naujokaitis-  
47 Lewis et al., 2013). PVA models describe a species' viability as a function of its life cycle,  
48 environmental conditions such as forage supply, and anthropogenic influences such as mechanical  
49 disruption of habitats (Beissinger and McCullough, 2002; Coulson et al., 2001).

50 Incorporating a dispersal process into such model analysis is considered another important factor  
51 for predicting both population viability (Driscoll et al., 2014) and species distribution (Bateman et al.,  
52 2013). According to metapopulation theory (Hanski, 1999; Levins, 1969), dispersal between habitats  
53 in a fragmented landscape can prevent extinction. Moreover, it is critical to the interpretation of  
54 SDMs whether and how quickly species can actually reach regions that have been projected to be  
55 suitable (Bateman et al., 2013).

56 In this study, we explore the combined effect of climate change and disturbance through land use  
57 on a dispersing species by conducting a PVA of the large marsh grasshopper (LMG, Figure 1) in  
58 cultivated grasslands of North Germany. The LMG, a well-studied species inhabiting wet meadows  
59 and marshes, is considered an indicator for the quality of grassland communities, similar to other  
60 grasshopper species (Báldi and Kisbenedek, 1997; Keßler et al., 2012; Sörensen, 1996). It is a slow, yet  
61 fair disperser due to its flight ability (Sörensen, 1996) and – as a likely profiteer of climate change –  
62 believed to extend its range (Leins et al., 2021; Poniatowski et al., 2020; Trautner and Hermann,  
63 2008). Anthropogenic disturbances, in particular the timing of mowing events, affect the species  
64 differently depending on the current stage of the LMG's life cycle. In terms of the LMG's  
65 environment, the German federal state of Schleswig-Holstein (SH) serves as study region, for which  
66 we extracted a highly resolved map of its grasslands (72,969 plots of roughly 6.25 ha each) using the  
67 software DSS-Ecopay (Mewes et al., 2012; Sturm et al., 2018). Furthermore, three climate change  
68 projections of increasing severity up to the year 2080 function as environmental conditions, while  
69 mechanical grassland mowing applies as anthropogenic disturbance.

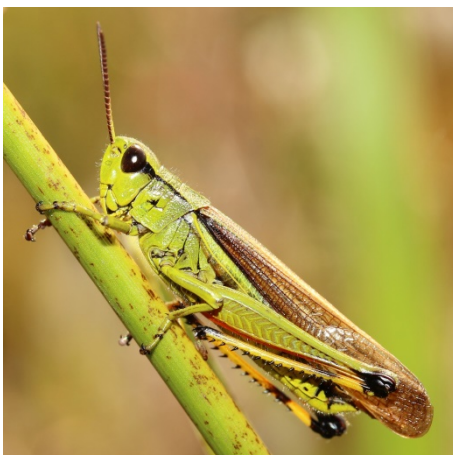

Figure 1: A male adult of the large marsh grasshopper, *Stethophyma grossum* (photo: Daniel Konn-Vetterlein)

70 With the described setting, we address the following three research questions regarding the LMG:  
71 (1) Are there (regional) differences in dispersal success depending on climate change scenario? (2) Is  
72 the success of dispersal additionally affected by spatial patterns such as grassland cover? (3) Can  
73 dispersal compensate for otherwise detrimental grassland mowing?

74 We used the PVA model HiLEG (*High-resolution Large Environmental Gradient*) introduced in  
75 Leins et al. (2021) and extended it by two features for the analysis of this study: the actual dispersal  
76 process within a predefined neighborhood of species habitats; and bilinear interpolation of the  
77 available, spatially coarse climate projections to achieve heterogeneous, gradual values of high  
78 spatial resolution throughout the study region. HiLEG is originally a spatially differentiated stage- and  
79 cohort-based simulation model that can be parameterized to adapt the life cycle of terrestrial animal  
80 species, in particular insects. The new features together with the high-resolution grassland map  
81 render HiLEG from a spatially *differentiated* to a spatially *explicit* simulation model.

82 In our preceding study (Leins et al. 2021) of the LMG, we explored the effects of climate change at  
83 a rather low spatial ( $12 \times 12 \text{ km}^2$ ) but high temporal resolution (daily time steps) while the 22  
84 predefined management schedules were timed on a weekly basis. We found that although the LMG  
85 mostly benefits from climate change, the timing of land use, i.e., the mowing schedule, is the most  
86 critical factor for the species' survival. This is particularly relevant, because the intensification of  
87 anthropogenic grassland use in Germany is advancing (Bundesamt für Naturschutz, 2017). Moreover  
88 we could show that the high temporal resolution we chose was indeed critical to detect the often  
89 large long-term effects of management schedules in combination with climate change.

90 The original model, however, represented isolated local effects on the LMG and ignored dispersal  
91 between habitats. Due to the described relevance of dispersal effects, it is convenient to include at  
92 least general assumptions about dispersal distances, rates and timing. Thus, we extended HiLEG by  
93 the features described above to analyze the implications of external drivers on dispersal success of  
94 the LMG. Together with the realistic distribution of the grassland map we can additionally consider  
95 spatial landscape patterns that possibly play a role once dispersal is included.

96 The result of the analysis depends on the relative timing of dispersal and mowing events, but local  
97 effects of climate change and management may still dominate. Since high-resolution maps of species  
98 occurrence are often not available, a more general question is therefore, what the additive value of  
99 introducing higher spatial resolution and dispersal to a large-scale PVA model might be.

## 100 **2 Material and methods**

101 There are four main elements to our analysis: the study region (German federal state SH), the target  
102 species (LMG), climate data (projections from 2020 to 2080) and land use (grassland mowing). The  
103 following subsections include a description of these elements. Simulations for the present study are  
104 performed using an extension of the HiLEG model introduced in Leins et al. (2021). Section 2.5  
105 includes a description of the model along with the relevant changes made to it for this study.

### 106 **2.1 North German grasslands**

107 The most northern German federal state SH serves as study region. More precisely, the state's  
108 grassland areas, i.e., 72,969 cells of roughly 6.25 ha in size each, were extracted using the Software  
109 DSS-Ecopay (Mewes et al., 2012; Sturm et al., 2018) and mapped to 107 climate cells (Figure 2) of

110 available climate projections (Section 2.3). The mapping of all cells including their further  
111 specifications are described in Supplement S4. Compared to the agricultural area of Germany as a  
112 whole (50.6 %), SH is the most intensively farmed federal state with 68.5 % (Statistisches Bundesamt,  
113 2021).

## 114 **2.2 The large marsh grasshopper**

115 The well-studied LMG (*Stethophyma grossum*, Linné 1758) is widely distributed in Central European  
116 grass- and wetlands (Heydenreich, 1999). Due to the high water requirements of its eggs, the species  
117 is bound to wet habitats such as meadows and marshes, although the grasshopper itself tolerates a  
118 wide range of temperatures and humidity (Ingrisch and Köhler, 1998; Koschuh, 2004). It used to be  
119 considered threatened in SH state (Winkler, 2000) but was recently given the status of “least  
120 concern” (Winkler and Haacks, 2019). Still, the LMG is regarded an indicator for the quality of  
121 grassland biotopes (Keßler et al., 2012; Sörensen, 1996), similar to other grasshopper species (Báldi and  
122 Kisbenedek, 1997). The annual life cycle of the LMG (Figure 3) can be divided into the following five  
123 life stages, beginning with the stage after oviposition: (1) prediapause development inside egg,  
124 roughly occurring between July and November, below ground; (2) diapause (preventing too early  
125 development during mild winter months), November-March, below ground; (3) embryo  
126 development before egg hatching, March-June, below ground; (4) larva maturation, May-October,  
127 above ground; (5) imago (including oviposition), July-October, above ground; (Heydenreich, 1999;  
128 Ingrisch and Köhler, 1998; Kleukers et al., 1997; Köhler and Weipert, 1991; Malkus, 1997; Marshall  
129 and Haes, 1988; Oschmann, 1969). Although the majority of a LMG population usually stays within a  
130 close range of its hatching location (Malkus, 1997), it was shown that new populations could  
131 establish in habitats several hundred meters from their origin within two years (Marzelli, 1994) while  
132 some offspring even reached distances of three or more kilometers (Keller, 2012; Van Strien, 2013).  
133 The latter is likely to be facilitated by the LMG’s flight ability (Sörensen, 1996).

134 Population development is affected differently by the climate conditions in a LMG habitat.  
135 Embryo hatching in spring (Wingerden et al., 1991) and larval development during summer (Ingrisch  
136 and Köhler, 1998; Uvarov, 1977) is accelerated by warm temperatures. Eggs/embryos experience  
137 stress in the event of a sustained dry soil before and after winter (Ingrisch, 1983). In the face of  
138 climate change, increasing temperatures might benefit the species by accelerating its development  
139 and expansion (Poniatowski et al., 2018; Trautner and Hermann, 2008) while extended droughts  
140 might prove detrimental for hygrophilous species like the LMG (Löffler et al., 2019).

## 141 **2.3 High-resolution climate projections**

142 We obtain climate data from high-resolution scenario simulations of the COSMO-CLM<sup>1</sup> regional  
143 climate model (CCLM4-8-17) published by Keuler et al. (2016). In our analysis, the lateral boundaries  
144 of COSMO-CLM were controlled by simulation results from the global model ICHEC<sup>2</sup>-EC-EARTH and  
145 three Representative Concentration Pathways (RCPs) distinguished by action taken towards reducing  
146 CO<sub>2</sub> emissions (in parenthesis): RCP2.6 (full force, FF), RCP4.5 (moderate, MOD) and RCP8.5 (business  
147 as usual, BAU). Time series of daily climate data (mean or sum) are provided by the regional model,  
148 spatially resolved to grid cells of size 12 x 12 km<sup>2</sup>. We used the years 2015-2080 of these time series  
149 and resampled them without losing long-term trends by randomly rearranging years within a 20-year  
150 time window (see Supplements S1, Section 5). This was necessary because the stochastic model

---

<sup>1</sup> Consortium for Small-scale Modeling in Climate Mode

<sup>2</sup> Irish Centre for High-End Computing

151 processes (section 2.5) would otherwise have been limited by the fact that only a single,  
152 deterministic climate projection was available per global model, RCP and grid cell. Three climate  
153 parameters were relevant for the LMG population dynamics as implemented in our model: *surface*  
154 *temperature* [°C], *contact water* [kg m<sup>-2</sup>] and *relative humidity upper ground* [%].

155 We applied bilinear interpolation to the climate values of the four adjacent climate cells of each  
156 grassland cell to achieve heterogeneous, gradual climate data values of high spatial resolution  
157 throughout the grassland of the study region. This was done by weighing the distances from the  
158 center of the adjacent climate cells to a grassland cell of interest, multiplying their climate values by  
159 the resulting weights and summing up the results (Section 2.5). Figure 4 illustrates the calculation of  
160 the directional weights for a single grassland cell using a simplified geometric example. The  
161 calculated values of the weights per grassland cell are referenced in Supplement S4.

## 162 **2.4 Grassland mowing**

163 Anthropogenic disturbances to the LMG are represented by mechanical grassland mowing that  
164 occurs two to three times per year depending on the applied of 18 mowing schedules (Table 1). In  
165 terms of our model, the impact of mowing on the model species is exclusively negative, though of  
166 different magnitude with respect to the above- and belowground life stages. Indirect effects of  
167 mowing, e.g. the observation that an early and/or late cut could be beneficial for the species  
168 (Malkus, 1997; Miller and Gardiner, 2018; Sonneck et al., 2008), are not included in the model.  
169 However, such extensive maintenance cuts with only a minor mortality effect on the LMG are  
170 accounted for by the base mowing schedule named *M20+00+44* (acronym: *M00*) that stands for an  
171 undisturbed environment and always takes effect where no other schedules apply. The first number  
172 of the schedule's name stands for early mowing calendar week 20 (day 133) and the last number for  
173 late mowing week 44 (day 301). The middle number defines the (additional) mowing weeks 22-38 of  
174 more intensive grassland mowing schedules (acronyms: *M22-M38*). If either of the numbers in the  
175 schedule name is a double zero, the respective mowing time is omitted, so there are only two  
176 mowing events rather than three.

177 Gerling et al. (2021) gave the main lead for the implementation of these two-cut schedules: on  
178 the one hand, they apply for the intensive schedules of mowing weeks 22-25 which omit early  
179 mowing in week 20, because grassland cuts are usually at least six weeks apart. On the other hand, it  
180 is the case for the schedules of mowing weeks 35-38 that omit mowing in week 44. Here, such an  
181 additional late maintenance cut is neither necessary, because of slowed grassland growth in autumn,  
182 nor economically beneficial for farmers.

## 183 **2.5 Extended HiLEG model**

184 A comprehensive description of the HiLEG model following the delta-ODD (Overview, Design  
185 concepts, Details) protocol (Grimm et al., 2020, 2006) is provided in Supplement S1. Here, we give a  
186 'Summary ODD' (Grimm et al., 2020), which includes a digest of HiLEG's main model description as  
187 introduced in Leins et al. (2021) and an overview of the extensions applied to the model for the  
188 present study. Unaffected mechanisms and parameters are either briefly described for general  
189 understanding or omitted in the main text. ODD keywords are in italics and capital letters hereafter.

190 We apply the HiLEG model to the LMG's life cycle, with its life stages influenced by climate and  
191 land use. Both, the species' development and mortality are affected by climate conditions, while the  
192 latter additionally increases during mowing events, especially in the species' aboveground phase



193 (Section 2.2). The model extension adds a dispersal module rendering HiLEG spatially explicit, thus  
194 allowing dispersal between populations within a predefined radius. Essential climate variables are  
195 spatially differentiated on a large scale (12 x 12 km<sup>2</sup>) and resolved to a higher scale of 6.25 ha in the  
196 model extension through bilinear interpolation (Figure 4) to achieve relevant spatial gradients within  
197 the grasslands of the North German federal state SH (Figure 2B). We ignore other spatial  
198 heterogeneity in land use and biotic variables such as vegetation height or habitat size. Hereafter, all  
199 descriptions that neither concern the dispersal process nor bilinear interpolation of the climate data  
200 were already included in the original model version.

201 While the ultimate *PURPOSE* of the HiLEG model is to analyze the regional effects of different  
202 climate change scenarios (CCS) and mowing schedules on the population viability of species such as  
203 the LMG (Leins et al., 2021), we here focus on exploring the potential role of dispersal, which was  
204 ignored in the original version of HiLEG. The *PURPOSE* of the extended model is to answer the  
205 following questions:

- 206 (1) Are there (regional) differences in dispersal success depending on CCS?
- 207 (2) Is the success of dispersal additionally affected by spatial patterns such as grassland cover?
- 208 (3) Can dispersal compensate for otherwise detrimental grassland mowing?

209 We have drawn from literature the empirical *PATTERNS* that ensure the model is sufficiently  
210 realistic for its purpose, namely the observed characteristics of the species' dispersal metrics and life  
211 cycle with its sensitivity to environmental conditions. The model design is aligned with these  
212 patterns. In terms of population structure, density, persistence and dispersal, the model output was  
213 not compared to other data, since they are scarce. All model predictions are, thus, relative, not  
214 absolute. However, 251 known LMG habitats (Figure 2B, orange circles) adapted from survey data<sup>3</sup>  
215 recorded in the years 2000 to 2016 are used to analyze some implications of regional effects. We  
216 used C++ for the implementation of the model's source code. It is available for both, the original  
217 model and extensions, via a GitLab repository<sup>4</sup> along with the executable program and the input files  
218 used for the simulations runs.

219 The following *ENTITIES* build the model's core: *Climate Cells* (defining large scale climate  
220 conditions in a 12 x 12 km<sup>2</sup> region), *Grassland Cells* (defining environmental conditions, e.g.  
221 interpolated climate values, on a scale of 250 x 250 m<sup>2</sup>), and per *Grassland Cell* a *Population*  
222 comprised of *Life Stages*, which are comprised of age-distinguished *Cohorts*. The most relevant *STATE*  
223 *VARIABLE* for the interpretation of the simulation results is the *density* [in individuals/eggs m<sup>-2</sup>] of a  
224 *Cohort*, *Life Stage* or *Population*. During a year, the LMG develops through five consecutive *Life*  
225 *Stages* (Figure 3): (1) prediapause, (2) diapause, (3) embryo, (4) larva, and (5) imago. *Density* is  
226 transferred to the next *Life Stage* (life cycle) or neighboring *Populations* (imago dispersal), and lost  
227 through mortality. The auxiliary *ENTITY* *Flow* controls the *density* transfer and in this function  
228 connects both the stages of the life cycle and habitats within a neighborhood. Environmental  
229 conditions such as climate, disturbances and grassland cover (stochastically) influence the amount of  
230 transferred/lost *density*. See Supplement S1, Section 2 for details on *ENTITIES* and *STATE VARIABLES*.

---

<sup>3</sup> provided by Landesamt für Landwirtschaft, Umwelt und ländliche Räume via our project partner Stiftung Naturschutz Schleswig-Holstein

<sup>4</sup> HiLEG GitLab repository: [git.ufz.de/leins/hileg](https://git.ufz.de/leins/hileg)

231 The model runs on basis of daily time steps where the *SCALE* corresponds to the sampling of the  
 232 climate data. By definition, a year has 364 days (52 full calendar weeks) to account for the weekly  
 233 mowing schedules. A simulation run takes 21,840 time steps (60 years) starting in the beginning of  
 234 2020 and terminating by the end of 2079. In the case of premature extinction of all *Populations*,  
 235 simulations stop earlier. Each *Grassland Cell* in the study region (Section 2.1) represents a potential  
 236 species habitat and is connected to cells within a predefined radius to allow dispersal between  
 237 habitats.

238 To be able to better observe dispersal effects and explore its potential role for population  
 239 viability, we chose an artificial *INITIAL* setting for each simulation run in terms of species distribution:  
 240 a single *Population* is placed at the center of one of the 107 *Climate Cells* (i.e., the *Grassland Cell*  
 241 closest to the geometric center of the *Climate Cell*, cf. black crosses in Figure 2B). In that way, we  
 242 distinguished between 107 populated starting and the remaining unpopulated non-starting locations.  
 243 Furthermore, a simulation run is *INITIALIZED* with one out of three CCS (section 2.3) and one of 18  
 244 mowing schedules (Table 1). The artificial setup with a single starting location per simulation run,  
 245 thus no initial populations at other locations of the study region, allows us studying regional dispersal  
 246 effects independent of potential immigration from other starting locations.

247 The *Population* at a starting location receives an initial density per *Life Stage* (i.e., 0.725 eggs m<sup>-2</sup>  
 248 in the diapause stage, zero density for all other *Life Stages*). Independent of the defined mowing  
 249 schedule, a starting location is only exposed to the extensive mowing schedule M20+00+44 by  
 250 default to serve as rather undisturbed source of dispersal to their close vicinity. *Populations* at non-  
 251 starting locations are initialized empty and receive their density through potential immigration. All  
 252 non-starting locations are subject to the initially defined mowing schedule.

253 For comparability with the original model setup of spatially stationary populations, we  
 254 additionally ran the simulations with extensive mowing schedule M20+00+44 while the dispersal  
 255 process was disabled. Thereby, the starting population remains confined to its source habitat and is  
 256 predominantly affected by climate. Comparison with the other mowing schedules is not practical  
 257 because, as described above, they are not applied to the source habitats in the simulations with  
 258 dispersal.

259 Distinct climate data time series were employed as *INPUT DATA* per *Climate Cell* to drive the  
 260 model dynamics. To have heterogeneous, gradual values at the location of each *Grassland Cell* as  
 261 well, bilinear interpolation was applied using the climate data of the (up to) four closest adjacent  
 262 neighbors. This is achieved by weighing the distances from a *Grassland Cell*  $G_a$  to the center of the  
 263 (up to) four *Climate Cells*  $\{\Omega_{a,NE}, \Omega_{a,SE}, \Omega_{a,SW}, \Omega_{a,NW}\}$  into secondary cardinal directions of  $G_a$ . The  
 264 resulting bilinear weights  $w_{bilin}^{a,dir}$  are multiplied with their respective climate values  $\omega_{clim}^{a,dir}$  and then  
 265 summed to achieve the interpolated value  $\omega_{clim}^a$  at  $G_a$ .

$$\omega_{clim}^a = \sum_{dir \in DIR_{sec}} w_{bilin}^{a,dir} \cdot \omega_{clim}^{a,dir} \quad (1)$$

$$w_{bilin}^{a,dir} = 1 - \frac{(size_{clim} - dist_{a,dir}^x) \cdot (size_{clim} - dist_{a,dir}^y)}{[size_{clim}]^2} \quad (2)$$

$$dist_{a,dir}^{xy} = |coord_{xy}^a - center_{xy}^{a,dir}| \cdot size_{hab} \quad (3)$$

266 Here,  $DIR_{sec} \subset DIR = \{N, NE, E, SE, S, SW, W, NW\}$  are the secondary cardinal directions NE,  
 267 SE, SW and NW of the cardinal directions North (N), Northeast (NE), East (E), Southeast (SE), South

268 (S), Southwest (SW), West (W) and Northwest (NW) and  $\omega_{clim}^{a,dir}$  is the projected value in the *Climate*  
 269 *Cell*  $\Omega_{a,dir}$  into direction *dir* of  $G_a$ . Size of *Climate Cell* and *Grassland Cell* are given by  $size_{clim}$  and  
 270  $size_{hab}$  (Table 2). The value  $dist_{a,dir}^{xy}$  for the distances in x- and y-direction are calculated using the  
 271 geometric center of a *Climate Cell* ( $center_{xy}^{a,dir}$ ).

272 Six main *PROCESSES* are included in the model: ‘Update environmental drivers’, ‘Flow update’,  
 273 ‘Life Stage update’, ‘Cohort update’, ‘Bilinear climate interpolation’ and ‘Dispersal setup’. The first  
 274 three are *SCHEDULED* for every inhabited *Grassland Cell* and during each time step of a simulation  
 275 run. ‘Cohort update’ and ‘Bilinear climate interpolation’ are submodels of ‘Life Stage update’ and  
 276 ‘Update environmental drivers’, respectively, and thus *SCHEDULED* every time step, as well.  
 277 ‘Dispersal setup’ is only *SCHEDULED* in the event of an empty *Grassland Cell* becoming inhabited.  
 278 Additionally, five types of sub *PROCESSES* can be associated with a *Life Stage* that apply depending  
 279 on parametrization: (1) mortality (all stages), (2) development (prediapause, diapause), (3) transfer  
 280 (all except imago), (4) reproduction (imago only), and (5) dispersal (imago only). For all sub  
 281 processes, a daily *base rate* representing benign or observed average environmental conditions is  
 282 assumed. Environmental drivers can modify (‘influence’) these base rates of the processes using  
 283 predefined functions called *Influences* (Supplement S1, Section 7.1)

284 While the first four above sub processes are already part of the original model, bilinear climate  
 285 interpolation (see above) and the dispersal process are introduced in the present version. Figure 2C  
 286 depicts the relevant grassland cells included for calculating the dispersal from an exemplary source  
 287 population inside the climate cell with ID 34 to the neighborhood in reach as it was applied for the  
 288 LMG. Cells belonging to this neighborhood are either within a predefined radius  $rad_{disp}$  (Table 2)  
 289 from the source population in question; or the closest (if any) grassland cells in each of the eight  
 290 cardinal directions *DIR* (see above) that have no neighbors within the predefined radius. The latter is  
 291 called long distance dispersal (LDD, see Supplement S1, Sections 7.1.7 and 7.5) and is included to  
 292 account for the LMG’s flight ability (Sörensen, 1996) that is especially relevant in otherwise isolated  
 293 habitats. Figure 5 illustrates how and in which cases grassland cells are selected for the LDD process.

294 The dispersal rate (Eq. 4) between any population  $P_a$  and a neighbor  $P_b$  within the neighborhood  
 295  $N_a$  is stochastically determined each time step using the *base dispersal rate* defined for the *Life Stage*  
 296 of interest (here,  $rate_{disp}^{ima}$  for the LMG’s imago stage) and a dispersal probability  $p_{a,b}^{disp}$  (Eq. 5):

$$rate_{disp}^{ima}(a,b) = rate_{disp}^{ima} \cdot p_{a,b}^{disp} \quad (4)$$

$$p_{a,b}^{disp} = pref_{a,b} \cdot p_{a,b}^{find} \cdot p_{a,b}^{surv} \quad (5)$$

297 The dispersal probability itself is calculated using a preference factor ( $pref_{a,b}$ ) to select nearby  
 298 target populations depending on the distance to all neighbors, a probability ( $p_{a,b}^{find}$ ) to find the  
 299 selected neighbor during the dispersal process and a probability ( $p_{a,b}^{surv}$ ) to survive the dispersal,  
 300 where both latter probabilities depend on grassland cover. Parameters applied to adjust the three  
 301 factors/probabilities are given in Table 2. Furthermore, the dispersers are subject to dispersal  
 302 mortality which is calculated using the inverse of all the dispersal probabilities multiplied by the *base*  
 303 *dispersal rate*:

$$mort_{disp}^{ima} = \left( 1 - \sum_{P_n \in N_a} p_{a,n}^{disp} \right) \cdot rate_{disp}^{ima} \quad (6)$$



304 Table 2 gives an overview of the simulation parameters additionally defined model extension. We  
305 followed the maximum covered distance of 1,500m described by Griffioen (1996) for the LMG's  
306 dispersal radius and defined the individuals that travelled the largest distance during one day (1 out  
307 of 168) in a 'mark and recapture' study by Malkus (1997) as dispersers to determine the daily base  
308 dispersal rate. The remaining dispersal parameters were approximated using initial test simulations  
309 and their usage is explained in more detail in Supplement S1, Section 7.5.

310 The model output is *DESIGNED* in such a way that different aspects of a population development  
311 and dispersal success can be *OBSERVED* or rather analyzed with respect to the study's *PURPOSE*. This  
312 data is distinguished into direct parameters produced for each inhabited cell during the simulation  
313 runs of the model itself, and indirect parameters calculated for a region's whole population in the  
314 post-processing of the direct output. Relevant evaluation parameters of the first category are the  
315 daily *life stage densities* given in individuals/eggs m<sup>-2</sup> depending on the respective stage. They allow  
316 *OBSERVING* the actual dispersal process over time. The indirect evaluation parameters, used to  
317 facilitate the *OBSERVATION* of a population's dispersal success, are the following four: (1) the  
318 *dispersal distance* in meters from a source habitat to an occupied habitat, (2) the *established distance*  
319 in meters from a source habitat to a habitat with imago density  $\geq 0.002$  individuals m<sup>-2</sup> during a year,  
320 (3) the *population size* in total number of individuals/eggs in all established habitats, and (4) the  
321 *population density* in individuals/eggs m<sup>-2</sup> for all established habitats. For the analysis, it was  
322 convenient to consider parameters (1) and (2) on the basis of their maximum value, i.e., the habitat  
323 farthest from the source, to compare dispersal success. All parameters were determined only using  
324 inhabited cells at the end of a simulation year to match values in the same life stage (typically  
325 diapause) and after mowing schedules have been fulfilled. In the following, *population size* and  
326 *density* are thus given in *eggs*, because populations are usually in the diapause life stage by the end  
327 of the year.

### 328 **3 Results**

329 The dispersal success of the LMG differed depending on region, climate change scenario (CCS) and  
330 mowing schedule.

331 Figure 6 depicts different outcomes of the dispersal process exemplary for an initial population in  
332 the center of climate cell 34 (black arrow in top left subplot). The first two rows of Figure 6 show the  
333 distribution of LMG populations chronologically in 15-year-steps in an undisturbed (first row) and  
334 disturbed environment (second row) using the MOD scenario: Under ideal conditions with extensive  
335 mowing (Table 1, M20+00+44), the LMG continuously spread out until it occupied grasslands in a  
336 distance > 20,500 meters and established in grasslands in a distance > 12,500 meters in the year  
337 2079 (Figure 6, first row). The dispersal process became significantly slowed down (10,250 / 8,000 m)  
338 when a mowing schedule with a deviating early cut in calendar week 23 (M00+23+44) was applied  
339 (Figure 6, second row). The three bottom columns of Figure 6 compare the final dispersal success in  
340 the year 2079 between simulation scenarios. It became evident that the mowing schedule had a  
341 different impact on the dispersal success depending on which CCS occurred: Deviating early mowing  
342 in, for instance, week 23 (Figure 6, third row, M00+23+44) still allowed substantial dispersal success  
343 for the LMG in the event of the less severe FF scenario (Figure 6, first bottom column), while it  
344 already became quite inhibited for both other scenarios (Figure 6, second/third bottom column),  
345 especially MOD. Mowing just one week later (Figure 6, M00+24+44) already had a great negative

346 impact on the dispersal success in all three CCS, allowing population establishment only in close  
347 vicinity of < 5,000 m for the FF scenario while restricting it to grassland roughly within the dispersal  
348 radius of 1,500 m from the source habitat for MOD and BAU. The strong negative impact in climate  
349 cell 34 continued for several weeks and the dispersal success afterwards became more inhibited for  
350 the FF scenario, shown on the example of additional mowing in calendar week 34 (Figure 6,  
351 M20+34+44). Later schedules starting with additional mowing in calendar week 35 (Figure 6,  
352 M20+35+00) allowed for gradual improvement in dispersal success. In these cases, the dispersal  
353 process became slightly more successful in the MOD than in the BAU scenario and remained  
354 restricted the most for the FF scenario.

355 Figure 7 provides a good overall view of the dispersal success in terms of *maximum established*  
356 *distance* at the end of a simulation run depending on CCS, mowing schedule and source habitat. In an  
357 undisturbed environment (M00), established populations on average reached distances of roughly  
358 14,000 m and at most up to 40,000 m. More importantly the figure highlights, in which simulations  
359 population establishment basically remained restricted to the dispersal radius of the source habitat  
360 (Figure 7, dots below black horizontal dashed line). This was the case for virtually all of the regions  
361 (or rather source habitats) when mowing schedules M20+26+44 (M26) to M20+31+44 (M31) were  
362 applied. Only outside of this time window, i.e., early mowing before calendar week 26 or late  
363 mowing after week 31, dispersal could be successful to some extent, depending on region and CCS.  
364 As described above on the example of climate cell 34, early mowing schedules were in favor of the FF  
365 scenario while late mowing was in favor of MOD and especially BAU.

366 We could find some interrelations (Figures 8), when comparing the evaluation parameters to  
367 simulations without dispersal (Figure 8A) or to grassland cover (Figure 8B). Note that Figure 8 only  
368 shows the spatial distribution of parameters stemming from simulations of the FF scenario, because  
369 spatial patterns were similar for all three CCS. For the benefit of simplicity, we therefore only  
370 illustrate one CCS. Please refer to Supplement S2 for comprehensive illustrations of the spatial  
371 distribution and yearly development of all evaluation parameters.

372 The *population density* of stationary populations without dispersal (Figure 8A) – though roughly  
373 being a factor 2.5 larger than in simulations with dispersal (Figure 8F) – showed a positive correlation  
374 of different extent with *population size* (Figure 8C), *population density* (Figure 8F) and *maximum*  
375 *established distance* (Figure 8I). Generally speaking, the correlation was always higher for less severe  
376 CCS (cf. p-values in Figures 8D, G, J). The *population size* could only moderately be derived from  
377 simulations without dispersal (Figure 8D) while there was a high correlation to the *population density*  
378 (Figure 8G). Even the *maximum established distance* could be fairly estimated from simulations  
379 without dispersal (Figure 8J).

380 Regarding the effect of spatial patterns on the dispersal success, there were only correlations  
381 expectable within the domain of the HiLEG model: independent of the CCS and mowing schedule,  
382 grassland cover within the dispersal radius of a source habitat (Figure 8B) positively correlated with  
383 *population size* (Figure 8E) but did not correlate with *population density* (Figure 8H); due to the LDD  
384 process, a large *dispersal distance* was achieved in regions with low grassland cover, resulting in a  
385 moderate negative correlation with this evaluation parameter (Figure 8K).

386 Though the correlation with grassland cover was similar for all CCS, Figure 9 shows that there are  
387 regional patterns in SH that only became apparent when looking at the difference (delta) of dispersal

388 success between CCS depending on the considered mowing schedule. Values shown in Figure 9 are  
389 the yearly absolute delta in *established distance* of the three CCS pairs (FF vs. MOD, FF vs. BAU, MOD  
390 vs. BAU) averaged over the whole simulation run. The most prominent of the regional patterns  
391 occurring in many of the deltas was a division of SH into two parts by a virtual diagonal line running  
392 from the Northwest to the Southeast (e.g. Figure 9D). Regions in the Northeast of this diagonal  
393 usually allowed a greater dispersal success for more severe CCS (Figures 9B-I) with occasional  
394 exceptions in the eastern part (Figures 9C-F). Though the tendency in the Southwest of the diagonal  
395 was a more successful dispersal for less severe CCS, there were more exceptions to this pattern and a  
396 more heterogeneous outcome. Most importantly, without substantial disturbances (Figure 9A) or  
397 when mowing late (Figure 9G), dispersal was more successful throughout all regions for the MOD  
398 scenario when comparing it to FF. Only with early mowing schedules, the diagonal pattern still  
399 applied (Figure 9D). Another notable pattern was the reduced dispersal success of the BAU scenario  
400 in the central western interior, which was most prominent when looking at the delta for late mowing  
401 of FF vs. BAU (Figure 9H) and MOD vs. BAU (Figure 9I). This pattern occurred because the dispersal  
402 success for the BAU scenario was strongly inhibited in the beginning and especially during the last  
403 decades of the simulation run, though it was not limited during mid-simulation (data not shown, see  
404 Supplement S3, e.g. pages 88 and 106). Overall the largest deltas in dispersal success occurred in the  
405 upper Northeast, along most of the west coast and in the southeastern regions.

406 Please note again that the regional deltas depicted in Figure 9 represent the mean deltas over the  
407 full simulation runs. In some regions it was, in fact, not consistently the same CCS over time that  
408 allowed for more successful dispersal (cf. above remarks). This can occasionally lead to three  
409 mistakable outcomes in Figure 9: (1) a low delta (light color) is illustrated though in most simulation  
410 years either one of the CCS allowed a clearly higher dispersal success, (2) the color indicates a lower  
411 delta than it actually occurred by the end of the simulations, (3) the color points to the opposite  
412 scenario than the one that shows the better dispersal success by the end of the simulations. In most  
413 of the cases, however, the color is a good indicator for the CCS allowing better dispersal success. We  
414 chose it deliberately to avoid focusing only on the final dispersal success and instead have a  
415 condensed overview of the delta in dispersal success that includes its chronology as well. We refer  
416 the interested reader to Supplement S3, where the deltas of all scenarios are provided including a  
417 detailed illustration of the discussed chronological changes in the delta of dispersal success.

## 418 **4 Discussion**

419 We extended the HiLEG model by a dispersal process and thereby obtained the following insights: (1)  
420 qualitative patterns of dispersal success are similar in the study region independent of CCS, but there  
421 are regions that allow more successful dispersal depending on severity of climate change; (2) spatial  
422 patterns have an effect on foremost population size (high grassland cover) and dispersal distance  
423 (low grassland cover), but only in a way that was to expect within the model domain; and (3) mowing  
424 schedules that might seem problematic when looking at an isolated habitat could still allow (slowed)  
425 dispersal outside of a population's home range. The implications of these findings will be discussed  
426 below in more detail.

### 427 **4.1 LMG is a fair but slow disperser**

428 We used a study by Marzelli (1994) to validate our results for a realistic implementation of the  
429 dispersal process and thus allow a reasonable comparison of the dispersal success. The author found

430 that in a natural and anthropogenically undisturbed grassland environment new LMG populations  
431 could establish in a distance of 400 m from an existing population within two years. Considering the  
432 defined measure for *established distance* (Section 2.5) our model confirmed these findings that the  
433 LMG is in fact a fair but slow disperser. Within an environment of extensive grassland mowing (Table  
434 1, M20+00+44) the LMG on average established in distances of about 14,000 m in 60 years (i.e.,  
435 roughly 467 m every two years).

436 This distance, though being a fair share larger than in the field study, is a good result for several  
437 reasons: The conditions in our simulations were considered ideal other than in the natural  
438 environment of the field study. The simulated grassland plots had a fixed size thus dispersal steps  
439 were restricted to a minimum distance of 250 m explaining the results > 400 m. Regarding the  
440 applied dispersal radius, a ‘mark and recapture’ study by Malkus (1997) only found specimens in a  
441 maximum distance of 624 m. Other studies using genetic markers, however, estimated maximum  
442 dispersal distances of 3,000 m (Van Strien, 2013) or calculated a connection distance between two  
443 populations of up to 3,264 m (Keller, 2012). The value of 1,500 m we adapted from Griffioen (1996)  
444 thus appears to be plausibly middle ground, at least in an environment of high grassland cover.

445 In a more fragmented landscape, mobility of the LMG must be considered in a different light.  
446 Bönsel and Sonneck (2011) conducted a triannual ‘mark and recapture’ study for an isolated, yet  
447 stable habitat and found that none of the LMG specimens migrated to either one of the four suitable  
448 1,500 to 9,000 m distant study sites, concluding a low dispersal activity in a highly fragmented  
449 environment. Marzelli (1994) observed, on the other hand, that the LMG is able to cross unsuitable  
450 areas of 300 m, allowing dispersal at least in a slightly fragmented landscape. Regarding the LDD  
451 process there is no quantification of its parameters but evidence that it occurs at least occasionally:  
452 individuals of the LMG were found on an island 10 km offshore with the next known onshore  
453 population about 16 km away (Oppel, 2005) while flight was observed where individuals ascended  
454 more than 20 meters into the air and out of sight (Trautner and Hermann, 2008).

455 With this knowledge we implemented LDD to allow expansion in fragmented landscapes where  
456 the distance between grassland plots is larger than 1,500 m (see Section 2.5). The effects on LMG  
457 dispersal by potentially unbridgeable barriers such as highways or forests and climate conditions  
458 such as wind direction were ignored in our simulations, as we focused on studying the interplay of  
459 climate change relevant parameters and mowing schedules. However, we increased dispersal  
460 mortality with decreasing grassland cover (Section 2.5) to account for unsuitable conditions in  
461 fragmented landscapes.

462 The fact that the dispersal success remained within reasonable bounds despite the applied  
463 simplifications and estimations provides the confidence to consider our simulation results of applied  
464 mowing schedules valid as well. More importantly, the projected rather short dispersal distances,  
465 especially in a disturbed environment, reinforce the choice for our approach to study the  
466 development of individual populations at regional or even local level.

## 467 **4.2 Climate change facilitates the expansion in North SH state**

468 Looking at the regional patterns of dispersal success in an undisturbed environment for each CCS  
469 separately, they are qualitatively very similar to the results for scenario FF in Figures 8C, F, I. Some of  
470 the patterns even follow climatic conditions already largely found in simulations without dispersal  
471 that will be discussed later. Comparing the deltas between evaluation parameters of the three CCS

472 pairs (FF vs. MOD, FF vs. BAU, MOD vs. BAU) revealed, however, regional differences (Figure 9) with  
473 possible implications for climate dependent management strategies.

474 With some exceptions in the Southwest, the LMG widely benefits from climate change in SH. This  
475 again confirms our previous findings (Leins et al., 2021) as well as the results from similar studies  
476 (Poniatowski et al., 2018; Trautner and Hermann, 2008). A moderate climate change (MOD) would be  
477 beneficial for the LMG in the whole study region. In case of severe climate change (BAU) only the  
478 western coastal regions would be worse off but the conditions running from North to East of the  
479 study region would improve the most in this scenario. The latter is relevant for two reasons.

480 First, the northeastern interior of SH is the region where currently most of the inhabited LMG  
481 habitats are located (Figure 2B, orange circles). With climate change in mind, conditions would thus  
482 improve the most particularly for these existing populations. Second, the northern regions are  
483 currently the most difficult terrain for the LMG, where hardly any populations are found. Although it  
484 is going to remain the least suitable region climatically (Figure 8F), it would improve the most in the  
485 more severe CCS (Figures 9B-F) and as a result could facilitate LMG expansion to the North.  
486 Poniatowski et al. (2020) already found that many grasshopper species including the LMG expand  
487 their range due to global warming. Especially a climate change driven northern range shift is often  
488 discussed for – among other species (Van der Putten, 2012) – insects as well (Stange and Ayres,  
489 2010) and was particularly shown for several grasshopper species (Poniatowski et al., 2018).

### 490 **4.3 Higher grassland cover allows larger population size**

491 The second region currently scarcely populated by the LMG is the west coast of SH and its  
492 interior. Only in the southern and central parts along the coast, a few populations are found. This is  
493 despite the fact of it having a high grassland cover (Figure 2B) and that our simulations showed  
494 suitable conditions of potentially high *population density* throughout the region (Figure 8F) even with  
495 mild climate change (FF). Especially on the central west coast with highest grassland cover (Figure 8B)  
496 that is notably correlated with high *population size* (Figure 8E,  $\rho$  between 0.63 and 0.68) there are  
497 currently no known LMG populations (Figure 2B, missing orange circles).

498 Even though it is reasonable that the higher availability of grassland allows a larger number of  
499 populations – and thus higher overall *population size*, the reason for the LMG to be spread thin  
500 apparently is neither the climatic nor the biotic conditions but likely the fact that the northwestern  
501 region of SH has the state's highest percentage of agricultural land, with more than 74%  
502 (Statistisches Amt für Hamburg und Schleswig-Holstein, 2021).

503 The negative correlation of grassland cover with *established distance* (Figure 8K,  $\rho=-0.45$  to  $-0.52$ ),  
504 on the other hand, can be ignored within the domain of the model. It is due to the fact that especially  
505 in fragmented landscapes the LDD process applies, allowing for above-average dispersal distances.

506 The main problem for all of the currently (mostly) uninhabited regions, especially in the  
507 Northwest of the study region, is the relatively large distance to the closest established LMG  
508 populations (Figure 2B, orange circles). Measures to assist the LMG to migrate by itself to these  
509 regions are likely to depend on local constraints and can only be partly derived from the results of  
510 the present study. We will nevertheless address potential management strategies later in the  
511 discussion.



#### 512 **4.4 Mowing slows down dispersal but still allows it up to a threshold**

513 The key to all above considerations is the right timing of grassland mowing because it is one of the  
514 critical factors for the dispersal success (Figure 7) and survival of LMG populations. In our preceding  
515 study, it was unclear how to interpret the diminishing effect of mowing on the LMG's lifetime during  
516 summer and early autumn (Leins et al., 2021, Figure 9). From the results of the present study we  
517 learn that, while population development might become increasingly restricted when mowing up to  
518 calendar week 25 and down to calendar week 32 (Figure 7), it still allows (slower) dispersal and  
519 establishment outside of a source habitat's dispersal radius (Figure 6).

520 It is important to bear in mind that there is a spillover effect within the dispersal radius due to the  
521 unrealistically undisturbed source habitats and that the mowing dates should be interpreted in  
522 relative, not absolute terms (Section 2.5). Yet, the resulting dates provide valuable insight for  
523 potential management strategies in agricultural grasslands, because it means that there are ways of  
524 supporting LMG establishment and dispersal while allowing economically beneficial land use.  
525 Especially the early mowing weeks of late spring and early summer are of relevance here, because  
526 they produce the best yields for farmers (Gerling et al., 2021).

527 Furthermore, with a minor climate change (FF) mowing is even less problematic for a longer  
528 period of time before summer in most parts of SH than it would be with the more severe scenarios  
529 MOD and BAU (Figures 9D-E). Assuming that begin and duration of vegetation growth do not shift in  
530 the same way as the life cycle development of the LMG, the longer period of unproblematic mowing  
531 with the FF scenario is highly relevant when considering the implications of climate change for the  
532 species:

533 We discussed above that from climate change alone the LMG would benefit in all (MOD) or most  
534 (BAU) parts of the study region. However, SH is with an agricultural area of 68.5% (Statistisches  
535 Bundesamt, 2021) the most intensively farmed state in Germany (50.6%). In such an environment,  
536 the LMG would thus be better off in case of minor climate change or none at all. It would still require  
537 measures reducing intensive grassland use to allow the LMG to thrive and expand, but they ought to  
538 be implemented easier and more cost-efficient.

#### 539 **4.5 Spatially stationary simulations as fair indicator for suitable regions**

540 As pointed out above, simulations without dispersal could already help identifying regions that in  
541 principle support LMG development and highlight the general implications of disturbances such as  
542 mowing on LMG populations. Depending on the evaluation parameter of simulations with dispersal,  
543 we found correlations of different extent with the *population density* stemming from the spatially  
544 stationary simulations (Figure 8, second column): Less surprisingly, the *population density* of  
545 established habitats within a region highly correlated (Figure 8G,  $\rho=0.74-0.87$ ), because it is mainly  
546 driven by regional climate conditions. Furthermore, there is only little correlation (Figure 8D,  $\rho=0.24-$   
547  $0.4$ ) with the *population size* as it depends more on grassland cover (see above).

548 Interestingly, however, there is a noticeable positive correlation (Figure 8J,  $\rho=0.56-0.71$ ) with the  
549 *established distance*, especially for the less severe CCS. Therefore, results from simulations of  
550 stationary populations could already be a good indicator for the development – and even the general  
551 ability to disperse – of species such as the LMG in a regional context. Within the domain of our  
552 model, high spatial resolution thus is not the key factor for broadly identifying (climatically) suitable

553 regions. This is a useful insight, especially because simulations without dispersal require less  
554 information about a target species and have a much shorter runtime.

555 The actual development and distribution of a dispersing population could, however, change both  
556 qualitatively and quantitatively depending on the spatial patterns and climatic gradients within a  
557 region. Particularly in combination with disturbances, the introduction of the dispersal process  
558 delivered valuable information: First, mowing schedules that seemed highly problematic in spatially  
559 stationary simulations could still allow (reduced) dispersal success. Second, the grassland cover could  
560 change the implications of a region's general suitability, because it might either hinder dispersal in  
561 fragmented landscapes of otherwise suitable conditions (Bönsel and Sonneck, 2011) or improve  
562 population establishment with high cover (Figure 8E) and thus a larger number of refuges.

563 The relevance of a dispersal process and spatial patterns might increase further if other factors  
564 are additionally considered. A mechanistic dispersal process (Vinatier et al., 2011) instead of the  
565 present statistical approach could, for instance, result in a more directed preference for neighboring  
566 habitats. This effect would especially apply, if (micro) climate was more heterogeneous or less  
567 gradually distributed in a study region. Similarly, a more realistic distribution of varying land use  
568 (timing) or other detrimental/beneficial environmental conditions could hinder/promote regional  
569 dispersal attempts. Furthermore, considering the effects of spatial patterns such as fragmentation  
570 on, for example, dispersal and mortality rates or extinction events might further change species  
571 distribution. Ways of including some of these mechanisms into the model to analyze the dispersal  
572 success in more detail are addressed at the end of the discussion.

#### 573 **4.6 Management decisions require expertise on a regional level**

574 Overall our results showed that there is no universal formula for protecting and supporting LMG  
575 populations in cultivated grasslands of North Germany, just a tendency in the implications of (future)  
576 climate change and a coarse window of unsuitable mowing schedules. Though a broad approach of  
577 quite extensive land use could be applied using our results, it would probably not be feasible on a  
578 large spatial scale, because such measures of poor spatial targeting have proven to be less effective  
579 (Meyer et al., 2015). At the same time, the uncertainty of climate change makes robust and cost-  
580 effective conservation policies necessary (Drechsler et al., 2021). Therefore, management decisions  
581 require expertise on a regional or even local level and should remain flexible, especially in grasslands  
582 (Joyce et al., 2016), to be able to react to the severity of climate change (Hulme, 2005).

583 Heller and Zavaleta (2009) compiled a ranked list of recommendations for management strategies  
584 and conservation planning in the face of climate change, some of which could be applied to the  
585 scenario in our analysis as well. Using their study in the following, we discuss approaches that could  
586 be derived from our results, i.e., strategies incorporating the (right) timing of mowing events.

587 At the top of their list in this regard, unsurprisingly, is the integration of climate change  
588 monitoring into conservation planning, particularly in terms of management schedules. Another  
589 apparent approach is to increase the number and size of refuges. Such refuges could in general be  
590 achieved by applying mowing schedules reasonably far outside the unsuitable time window and  
591 nearby known LMG habitats (Figure 2B, orange circles).

592 Depending on management goal and occurring climate change (cf. flexible management),  
593 different parts of SH (Figure 9) should be prioritized for these measures: the northeastern regions, if  
594 the goal is reinforcing beneficiary populations under *more* severe climate change or preserving

595 vulnerable ones under a *less* severe climate change; and the southwestern regions, to reinforce  
596 beneficiary populations under *less* severe climate change or preserve vulnerable ones under a *more*  
597 severe climate change.

598 In terms of dispersal, increasing connectivity by locating habitats close to each other and creating  
599 migration corridors or stepping stones is named as a key factor. Buffered zones around protected  
600 habitats are discussed as well, because they could compensate for unforeseen population shifts due  
601 to changing conditions. These measures are of different relevance inside our study region, as both  
602 grassland cover and species occurrence vary depending on region. The most inhabited eastern  
603 interior of SH is quite distant from the widely uninhabited Northwest, having large patches of low or  
604 no grassland cover in between. Here as well as in other inhabited regions of substantial grassland  
605 cover, the more practical approach may be to support existing populations by focusing on more  
606 extensive mowing schedules while allowing undirected dispersal through the creation of buffered  
607 zones or nearby habitats of less intensive mowing.

608 Regarding directed dispersal, there are only a few populated habitats on the edge of the  
609 uninhabited region, which likely require reinforcement and/or buffered zones first, before they can  
610 serve as origin for a northwestwards dispersal path along smartly distributed stepping stones of  
611 extensively mown grassland plots. Given our results, autonomous establishment of a LMG population  
612 in the Northwest would nonetheless take several decades.

613 Inhabited regions of low grassland cover as they are mostly found in the Southeast of the study  
614 region might, however, need another approach for assisting survival and/or dispersal of the LMG:  
615 since suitable habitats are rather scarce, it is highly relevant to leave existing populations as  
616 undisturbed as possible. Creating similarly undisturbed satellite habitats in terms of metapopulation  
617 theory (Hanski, 1999; Levins, 1969) could additionally promote occasional (long distance) dispersal  
618 and compensate for local extinction, e.g., due to unsuitable climate events.

619 Yet, not only because the benefits of metapopulation dynamics in fragmented landscapes for  
620 slowly dispersing species like the LMG are controversial (Bönsel and Sonneck, 2011) as discussed  
621 above, it would require an additional study to assess the above hypotheses. Simulations within such  
622 a study should include the analysis of more diverse management schedules in the neighborhood of  
623 an established population or along a migration path, and possibly more mechanistic consideration of  
624 small-scale LMG dispersal behavior. Furthermore, it would have to reduce the unrealistic positive  
625 effect within the dispersal radius of a source habitat (Section 4.4) to obtain robust results regarding  
626 local dispersal success.

627 Such simulations could easily be conducted with only minor modifications to the HILEG model and  
628 deliver valuable insights to conservation agencies in SH for the protection of local LMG populations.  
629 With the right set of parameters, the model could additionally be adjusted for the life cycle of other  
630 species to achieve a broader picture of the implications for disturbed grassland communities in the  
631 face of climate change. However, as grasshopper species like the LMG are considered indicators for  
632 the quality of grassland biotopes (Báldi and Kisbenedek, 1997; Keßler et al., 2012; Sörensen, 1996), the  
633 analysis of single species already gives a good idea of the implications for such a community.

## 634 **5 Conclusion**

635 The introduction of dispersal into the highly resolved, yet formerly non-spatially-explicit HiLEG model  
636 provided valuable insights regarding the implications of anthropogenic disturbances for the large  
637 marsh grasshopper (LMG) under different climate change scenarios. Our study reconfirmed that the  
638 LMG in principle benefits from a moderate climate change in temperate regions and was also helpful  
639 in unraveling the impact of grassland mowing schedules that were previously unclear. Namely that  
640 some of the schedules, despite inhibiting population development, could still allow species dispersal  
641 to some extent. It depends on the regional conditions and severity of climate change which mowing  
642 schedules this mainly involves.

643 A milder climate change permits a longer mowing period in the beginning of the season and is  
644 more beneficial in the southwestern parts of Schleswig-Holstein (SH). This is an important  
645 observation, because early mowing provides the highest yields for farmers. More severe climate  
646 change, on the other hand, allows for earlier resumption of mowing after summer, especially outside  
647 the western interior of the state. Grassland cover only plays a minor role in the development of the  
648 LMG, though a high cover facilitates population establishment within a region.

649 However, many of the regions that might either improve the most under climate change (North  
650 SH) or offer high grassland cover (West SH) are currently scarcely populated by the LMG. Assisting  
651 the grasshopper in migrating to those regions will require flexible management decisions on a local  
652 level, especially because the key factors hindering the LMG from thriving are anthropogenic (thus  
653 controllable) disturbances such as grassland mowing. Improving these practices likely benefits other  
654 (insect) species as well, because of the LMG's role as indicator for the quality of grasslands.

655 In the above discussion, we identified five factors that we recommend to consider for such  
656 regional management decisions: (1) the development of climate conditions (when and in which  
657 region to apply measures); (2) the grassland cover (size, number and distribution of refuges); (3) the  
658 existence of LMG populations (habitats prioritized for protection); (4) in uninhabited regions, the  
659 distance to and direction of established populations (size, number and distribution of stepping  
660 stones); and (5) the local land use custom (opportunities and economical acceptance for measures of  
661 protection).

662 The results from both the present and previous study, with and without consideration of  
663 dispersal, provided a number of key indicators for potential management strategies in cultivated  
664 landscapes. With their input alone, a reasonable protection of grassland (insect) species such as the  
665 LMG can be achieved. To further assist stakeholders on a regional level in their decision for viable  
666 management strategies, a more realistic or rather heterogeneous integration of disturbances could  
667 be of relevance. Such a follow up study can easily be performed with only minor modifications to the  
668 HiLEG model along with the matching set of parameters – eligible for other target species as well.

## 669 **6 Acknowledgements**

670 This work has been carried out within the project Ecoclimb ([www.b-tu.de/en/ecoclimb](http://www.b-tu.de/en/ecoclimb)), funded by  
671 the German Federal Ministry of Education and Research (grant no. 01LA1803B). We especially thank  
672 Björn Schulz from the *Stiftung Naturschutz Schleswig-Holstein* for providing further expertise and  
673 literature about the dispersal behavior of the large marsh grasshopper. Furthermore, we are grateful  
674 to Volker Grimm for his valuable support during the drafting process.

## 675 **7 Competing Interests Statement**

676 There is no known competing interest that could have influenced the present work.

## 677 **8 Author Contributions section**

678 JL: concept, design and implementation of the model; acquisition and processing of input data;  
679 analysis and interpretation of the simulation output; drafting and visualization of the article. MD:  
680 model concept; data interpretation; review and editing of the article.

## 681 **9 Data Accessibility Statement**

682 Open access model code, executables and required input data are available via GitLab  
683 ([git.ufz.de/leins/hileg](https://git.ufz.de/leins/hileg)). Output data generated by the HiLEG simulation runs for this study can be  
684 found at [ufz.de/record/dmp/archive/11898/en/](https://ufz.de/record/dmp/archive/11898/en/) and the aggregated data used for analysis and  
685 illustration at [ufz.de/record/dmp/archive/11896/en/](https://ufz.de/record/dmp/archive/11896/en/) (with dispersal) and  
686 [ufz.de/record/dmp/archive/11899](https://ufz.de/record/dmp/archive/11899/) (without dispersal). A representation of the data used for  
687 mapping and weighing climate and grassland cells for bilinear interpolation can be found at  
688 [ufz.de/record/dmp/archive/11900](https://ufz.de/record/dmp/archive/11900/). A GitLab link to the exact model version along with detailed  
689 descriptions of the input data and simulation parameters will follow upon publication.

## 690 **10 References**

- 691 Báldi, A., Kisbenedek, T., 1997. Orthopteran assemblages as indicators of grassland naturalness in  
692 Hungary. *Agric. Ecosyst. Environ.* 66, 121–129. [https://doi.org/10.1016/S0167-](https://doi.org/10.1016/S0167-8809(97)00068-6)  
693 [8809\(97\)00068-6](https://doi.org/10.1016/S0167-8809(97)00068-6)
- 694 Bateman, B.L., Murphy, H.T., Reside, A.E., Mokany, K., VanDerWal, J., 2013. Appropriateness of full-,  
695 partial- and no-dispersal scenarios in climate change impact modelling. *Divers. Distrib.* 19,  
696 1224–1234. <https://doi.org/10.1111/ddi.12107>
- 697 Beissinger, S.R., McCullough, D.R., 2002. *Population Viability Analysis*. University of Chicago Press.
- 698 Bönsel, A.B., Sonneck, A.-G., 2011. Habitat use and dispersal characteristic by *Stethophyma grossum*: the role of habitat isolation and stable  
699 habitat conditions towards low dispersal. *J. Insect Conserv.* 15, 455–463.  
700 <https://doi.org/10.1007/s10841-010-9320-4>
- 701 Bundesamt für Naturschutz, 2017. *Agrar-Report 2017 - Biologische Vielfalt in der Agrarlandschaft*.  
702 BfN / Bundesamt für Naturschutz (Hrsg.), Bonn.
- 703 Coulson, T., Mace, G.M., Hudson, E., Possingham, H., 2001. The use and abuse of population viability  
704 analysis. *Trends Ecol. Evol.* 16, 219–221. [https://doi.org/10.1016/S0169-5347\(01\)02137-1](https://doi.org/10.1016/S0169-5347(01)02137-1)
- 705 Drechsler, M., Gerling, C., Keuler, K., Leins, J., Sturm, A., Wätzold, F., 2021. A quantitative approach  
706 for the design of robust and cost-effective conservation policies under uncertain climate  
707 change: The case of grasshopper conservation in Schleswig-Holstein, Germany. *J. Environ.*  
708 *Manage.* 296, 113201. <https://doi.org/10.1016/j.jenvman.2021.113201>
- 709 Driscoll, D.A., Banks, S.C., Barton, P.S., Ikin, K., Lentini, P., Lindenmayer, D.B., Smith, A.L., Berry, L.E.,  
710 Burns, E.L., Edworthy, A., Evans, M.J., Gibson, R., Heinsohn, R., Howland, B., Kay, G., Munro,  
711 N., Scheele, B.C., Stirnemann, I., Stojanovic, D., Sweaney, N., Villaseñor, N.R., Westgate, M.J.,  
712 2014. The Trajectory of Dispersal Research in Conservation Biology. *Systematic Review. PLOS*  
713 *ONE* 9, e95053. <https://doi.org/10.1371/journal.pone.0095053>
- 714 Gerling, C., Drechsler, M., Keuler, K., Leins, J., Radtke, K., Schulz, B., Sturm, A., Wätzold, F., 2021.  
715 Cost-effective conservation in the face of climate change: combining ecological-economic  
716



- 717 modelling and climate science for the cost-effective spatio-temporal allocation of  
718 conservation measures in agricultural landscapes.
- 719 Griffioen, R., 1996. Over het dispersievermogen van de Moerassprinkhaan. *Nieuwsbr. Saltabel* 15,  
720 39–41.
- 721 Grimm, V., Berger, U., Bastiansen, F., Eliassen, S., Ginot, V., Giske, J., Goss-Custard, J., Grand, T.,  
722 Heinz, S.K., Huse, G., Huth, A., Jepsen, J.U., Jørgensen, C., Mooij, W.M., Müller, B., Pe'er, G.,  
723 Piou, C., Railsback, S.F., Robbins, A.M., Robbins, M.M., Rossmanith, E., Rügen, N., Strand, E.,  
724 Souissi, S., Stillman, R.A., Vabø, R., Visser, U., DeAngelis, D.L., 2006. A standard protocol for  
725 describing individual-based and agent-based models. *Ecol. Model.* 198, 115–126.  
726 <https://doi.org/10.1016/j.ecolmodel.2006.04.023>
- 727 Grimm, V., Railsback, S.F., Vincenot, C.E., Berger, U., Gallagher, C., DeAngelis, D.L., Edmonds, B., Ge,  
728 J., Giske, J., Groeneveld, J., Johnston, A.S.A., Milles, A., Nabe-Nielsen, J., Polhill, J.G., Radchuk,  
729 V., Rohwäder, M.-S., Stillman, R.A., Thiele, J.C., Ayllón, D., 2020. The ODD Protocol for  
730 Describing Agent-Based and Other Simulation Models: A Second Update to Improve Clarity,  
731 Replication, and Structural Realism. *J. Artif. Soc. Soc. Simul.* 23, 7.
- 732 Hanski, I., 1999. *Metapopulation ecology*. Oxford University Press.
- 733 Heller, N.E., Zavaleta, E.S., 2009. Biodiversity management in the face of climate change: A review of  
734 22 years of recommendations. *Biol. Conserv.* 142, 14–32.  
735 <https://doi.org/10.1016/j.biocon.2008.10.006>
- 736 Heydenreich, M., 1999. Die Bedeutung der Heuschreckenart *Stethophyma grossum* L., 1758  
737 (Caelifera: Acrididae) als Bestandteil eines Zielartensystems für das Management von  
738 Niedermooren.
- 739 Hulme, P.E., 2005. Adapting to climate change: is there scope for ecological management in the face  
740 of a global threat? *J. Appl. Ecol.* 42, 784–794. [https://doi.org/10.1111/j.1365-](https://doi.org/10.1111/j.1365-2664.2005.01082.x)  
741 [2664.2005.01082.x](https://doi.org/10.1111/j.1365-2664.2005.01082.x)
- 742 Ingrisch, S., 1983. Zum Einfluß der Feuchte auf die Schlupfrate und Entwicklungsdauer der Eier  
743 mitteleuropäischer Feldheuschrecken (Orthoptera, Acrididae). *Dtsch. Entomol. Z.* 30, 1–15.  
744 <https://doi.org/10.1002/mmnd.19830300102>
- 745 Ingrisch, S., Köhler, G., 1998. *Die Heuschrecken Mitteleuropas*, Die Neue Brehm-Bücherei. Westarp  
746 Wissenschaften, Magdeburg.
- 747 Joyce, C.B., Simpson, M., Casanova, M., 2016. Future wet grasslands: ecological implications of  
748 climate change. *Ecosyst. Health Sustain.* 2, e01240. <https://doi.org/10.1002/ehs2.1240>
- 749 Keller, D., 2012. Insect dispersal in fragmented agricultural landscapes. ETH Zurich.  
750 <https://doi.org/10.3929/ETHZ-A-007619649>
- 751 Keßler, T., Cierjacks, A., Ernst, R., Dziöck, F., 2012. Direct and indirect effects of ski run management  
752 on alpine Orthoptera. *Biodivers. Conserv.* 21, 281–296. [https://doi.org/10.1007/s10531-011-](https://doi.org/10.1007/s10531-011-0184-z)  
753 [0184-z](https://doi.org/10.1007/s10531-011-0184-z)
- 754 Keuler, K., Radtke, K., Kotlarski, S., Lüthi, D., 2016. Regional climate change over Europe in COSMO-  
755 CLM: Influence of emission scenario and driving global model. *Meteorol. Z.* 25, 121–136.  
756 <https://doi.org/10.1127/metz/2016/0662>
- 757 Kleukers, R., Van Nieukerken, E., Odé, B., Willemse, L., Van Wingerden, W., 1997. *De sprinkhanen en*  
758 *kekels van Nederland (Orthoptera)*.
- 759 Köhler, G., Weipert, J., 1991. Beiträge zur Faunistik und Ökologie des Naturschutzgebietes  
760 'Apfelstädter Ried', Kr Erfurt-Land Teil IV Orthoptera: Saltatoria. *Arch Nat*  
761 *Landschaftforschung* 31, 181–195.
- 762 Koschuh, A., 2004. Verbreitung, Lebensräume und Gefährdung der Sumpfschrecke *Stethophyma*  
763 *grossum* (L., 1758) (Saltatoria) in der Steiermark. *Joannea Zool.* 26.
- 764 Leins, J.A., Banitz, T., Grimm, V., Drechsler, M., 2021. High-resolution PVA along large environmental  
765 gradients to model the combined effects of climate change and land use timing: lessons from  
766 the large marsh grasshopper. *Ecol. Model.* 440, 109355.  
767 <https://doi.org/10.1016/j.ecolmodel.2020.109355>

- 768 Levins, R., 1969. Some Demographic and Genetic Consequences of Environmental Heterogeneity for  
769 Biological Control. *Bull. Entomol. Soc. Am.* 15, 237–240.  
770 <https://doi.org/10.1093/besa/15.3.237>
- 771 Löffler, F., Poniatowski, D., Fartmann, T., 2019. Orthoptera community shifts in response to land-use  
772 and climate change – Lessons from a long-term study across different grassland habitats.  
773 *Biol. Conserv.* 236, 315–323. <https://doi.org/10.1016/j.biocon.2019.05.058>
- 774 Malkus, J., 1997. Habitatpräferenzen und Mobilität der Sumpfschrecke (*Stethophyma grossum* L.  
775 1758) unter besonderer Berücksichtigung der Mahd. *Articulata* 12, 1–18.
- 776 Marshall, J.A., Haes, E.C.M., 1988. Grasshoppers and allied insects of Great Britain and Ireland.  
777 Grasshopp. Allied Insects G. B. Irel.
- 778 Marzelli, M., 1994. Ausbreitung von *Mecostethus grossus* auf einer Ausgleichs-und  
779 Renaturierungsfläche. *Articulata* 9, 25–32.
- 780 Masson-Delmotte, V., P. Zhai, A. Pirani, S. L. Connors, C. Péan, S. Berger, N. Caud, Y. Chen, L.  
781 Goldfarb, M. I. Gomis, M. Huang, K. Leitzell, E. Lonnoy, J. B. R. Matthews, T. K. Maycock, T.  
782 Waterfield, O. Yelekçi, R. Yu, B. Zhou (eds.), in press. IPCC, 2021: Climate Change 2021: The  
783 Physical Science Basis. Contribution of Working Group I to the Sixth Assessment Report of  
784 the Intergovernmental Panel on Climate Change. Cambridge University Press.
- 785 Mewes, M., Sturm, A., Johst, K., Drechsler, M., Wätzold, F., 2012. Handbuch der Software Ecopay zur  
786 Bestimmung kosteneffizienter Ausgleichszahlungen für Maßnahmen zum Schutz  
787 gefährdeter Arten und Lebensraumtypen im Grünland. UFZ-Bericht, Helmholtz-Zentrum für  
788 Umweltforschung.
- 789 Meyer, C., Reutter, M., Matzdorf, B., Sattler, C., Schomers, S., 2015. Design rules for successful  
790 governmental payments for ecosystem services: Taking agri-environmental measures in  
791 Germany as an example. *J. Environ. Manage.* 157, 146–159.  
792 <https://doi.org/10.1016/j.jenvman.2015.03.053>
- 793 Miller, J., Gardiner, T., 2018. The effects of grazing and mowing on large marsh grasshopper,  
794 *Stethophyma grossum* (Orthoptera: Acrididae), populations in Western Europe: a review. *J.*  
795 *Orthoptera Res.* 27(1), 91–96. <https://doi.org/10.3897/jor.27.23835>
- 796 Naujokaitis-Lewis, I.R., Curtis, J.M.R., Tischendorf, L., Badzinski, D., Lindsay, K., Fortin, M.-J., 2013.  
797 Uncertainties in coupled species distribution–metapopulation dynamics models for risk  
798 assessments under climate change. *Divers. Distrib.* 19, 541–554.  
799 <https://doi.org/10.1111/ddi.12063>
- 800 Oliver, T.H., Morecroft, M.D., 2014. Interactions between climate change and land use change on  
801 biodiversity: attribution problems, risks, and opportunities. *WIREs Clim. Change* 5, 317–335.  
802 <https://doi.org/10.1002/wcc.271>
- 803 Oppel, S., 2005. Die Heuschreckenfauna der jungen Düneninsel Trischen im schleswig-holsteinischen  
804 Wattenmeer (Insecta: Saltatoria) 6.
- 805 Oschmann, M., 1969. Faunistisch-ökologische Untersuchungen an Orthopteren im Raum von Gotha.  
806 *Hercynia - Ökol. Umw. Mitteleur.* 6, 115–168.
- 807 Poniatowski, D., Beckmann, C., Löffler, F., Münsch, T., Helbing, F., Samways, M.J., Fartmann, T., 2020.  
808 Relative impacts of land-use and climate change on grasshopper range shifts have changed  
809 over time. *Glob. Ecol. Biogeogr.* 29, 2190–2202. <https://doi.org/10.1111/geb.13188>
- 810 Poniatowski, D., Münsch, T., Bianchi, F., Fartmann, T., 2018. Arealveränderungen mitteleuropäischer  
811 Heuschrecken als Folge des Klimawandels. *Nat. Landsch.* 553–561.  
812 <https://doi.org/10.17433/12.2018.50153645.553-561>
- 813 Sonneck, A.-G., Bönsel, A., Matthes, J., 2008. Der einfluss von Landnutzung auf die Habitate von  
814 *Stethophyma grossum* (Linnaeus, 1758) an Beispielen aus Mecklenburg-Vorpommern.  
815 *Articulata* 23, 15–30.
- 816 Sörens, A., 1996. Zur Populationsstruktur, Mobilität und dem Eiablageverhalten der Sumpfschrecke  
817 (*Stethophyma grossum*) und der Kurzflügeligen Schwertschrecke (*Conocephalus dorsalis*).  
818 *Articulata* 11, 37–48.

- 819 Srivastava, V., Lafond, V., Griess, V. C., 2019. Species distribution models (SDM): applications,  
820 benefits and challenges in invasive species management. CAB Rev. Perspect. Agric. Vet. Sci.  
821 Nutr. Nat. Resour. 14. <https://doi.org/10.1079/PAVSNNR201914020>
- 822 Stange, E.E., Ayres, M.P., 2010. Climate Change Impacts: Insects, in: John Wiley & Sons, Ltd (Ed.),  
823 Encyclopedia of Life Sciences. John Wiley & Sons, Ltd, Chichester, UK, p. a0022555.  
824 <https://doi.org/10.1002/9780470015902.a0022555>
- 825 Statistisches Amt für Hamburg und Schleswig-Holstein, 2021. Bodenflächen in Schleswig-Holstein am  
826 31.12.2020 nach Art der tatsächlichen Nutzung. Statistisches Amt für Hamburg und  
827 Schleswig-Holstein, Hamburg.
- 828 Statistisches Bundesamt, 2021. Land- und Forstwirtschaft, Fischerei - Bodenfläche nach Art der  
829 tatsächlichen Nutzung. Statistisches Bundesamt (Destatis), Wiesbaden.
- 830 Sturm, A., Drechsler, M., Johst, K., Mewes, M., Wätzold, F., 2018. DSS-Ecopay – A decision support  
831 software for designing ecologically effective and cost-effective agri-environment schemes to  
832 conserve endangered grassland biodiversity. Agric. Syst. 161, 113–116.  
833 <https://doi.org/10.1016/j.agsy.2018.01.008>
- 834 Trautner, J., Hermann, G., 2008. Die Sumpfschrecke (*Stethophyma grossum* L., 1758) im Aufwind-  
835 Erkenntnisse aus dem zentralen Baden-Württemberg. *Articulata* 23, 37–52.
- 836 Uvarov, B., 1977. Grasshoppers and locusts. A handbook of general acridology Vol. 2. Behaviour,  
837 ecology, biogeography, population dynamics. Grasshopp. Locusts Handb. Gen. Acridology Vol  
838 2 Behav. Ecol. Biogeogr. Popul. Dyn.
- 839 Van der Putten, W.H., 2012. Climate Change, Aboveground-Belowground Interactions, and Species'  
840 Range Shifts. *Annu. Rev. Ecol. Evol. Syst.* 43, 365–383. <https://doi.org/10.1146/annurev-ecolsys-110411-160423>
- 841
- 842 Van der Putten, W.H., Macel, M., Visser, M.E., 2010. Predicting species distribution and abundance  
843 responses to climate change: why it is essential to include biotic interactions across trophic  
844 levels. *Philos. Trans. R. Soc. B Biol. Sci.* 365, 2025–2034.  
845 <https://doi.org/10.1098/rstb.2010.0037>
- 846 Van Strien, M.J., 2013. Advances in landscape genetic methods and theory: lessons learnt from  
847 insects in agricultural landscapes. ETH Zurich. <https://doi.org/10.3929/ETHZ-A-009761395>
- 848 Vinatier, F., Tixier, P., Duyck, P.-F., Lescourret, F., 2011. Factors and mechanisms explaining spatial  
849 heterogeneity: a review of methods for insect populations. *Methods Ecol. Evol.* 2, 11–22.  
850 <https://doi.org/10.1111/j.2041-210X.2010.00059.x>
- 851 Wingerden, W.K.R.E. van, Musters, J.C.M., Maaskamp, F.I.M., 1991. The influence of temperature on  
852 the duration of egg development in West European grasshoppers (Orthoptera: Acrididae).  
853 *Oecologia* 87, 417–423. <https://doi.org/10.1007/BF00634600>
- 854 Winkler, C., 2000. Die Heuschrecken Schleswig-Holsteins - Rote Liste, Rote Liste [Schleswig-Holstein].  
855 Eigenverl, Flintbek.
- 856 Winkler, C., Haacks, M., 2019. Die Heuschrecken Schleswig-Holsteins, 4. Fassung, Stand der Daten:  
857 Dezember 2017. ed, Schriftenreihe: LLUR SH Natur RL\$127. Landesamt für Landwirtschaft,  
858 Umwelt und Ländliche Räume, Kiel.
- 859

860 **11 Tables**  
861

862 Table 1: Yearly grassland mowing schedules as applied in the simulation runs. First column gives the names of the 18  
 863 mowing schedules that encode the calendar weeks of yearly mowing occurrence divided by a plus (+) symbol. An  
 864 acronym of the schedule name is provided in the second column, encoding the relevant mowing week in its name. The  
 865 last three columns give the actual yearly mowing days (first day of respective calendar week) per mowing schedule.  
 866 Schedules that include cells containing a dash (encoded by '00' in the respective name) only have two mowing  
 867 occurrences per year, all others have three. The first mowing schedule *M20+00+44* represents extensive mowing, while  
 868 more intensive mowing schedules follow in the rows below the double line.

| Schedule name    | Acronym    | Mowing days |     |     |
|------------------|------------|-------------|-----|-----|
| <i>M20+00+44</i> | <i>M00</i> | 133         | -   | 301 |
| <i>M00+22+44</i> | <i>M22</i> | -           | 147 | 301 |
| <i>M00+23+44</i> | <i>M23</i> | -           | 154 | 301 |
| <i>M00+24+44</i> | <i>M24</i> | -           | 161 | 301 |
| <i>M00+25+44</i> | <i>M25</i> | -           | 168 | 301 |
| <i>M20+26+44</i> | <i>M26</i> | 133         | 175 | 301 |
| <i>M20+27+44</i> | <i>M27</i> | 133         | 182 | 301 |
| <i>M20+28+44</i> | <i>M28</i> | 133         | 189 | 301 |
| <i>M20+29+44</i> | <i>M29</i> | 133         | 196 | 301 |
| <i>M20+30+44</i> | <i>M30</i> | 133         | 203 | 301 |
| <i>M20+31+44</i> | <i>M31</i> | 133         | 210 | 301 |
| <i>M20+32+44</i> | <i>M32</i> | 133         | 217 | 301 |
| <i>M20+33+44</i> | <i>M33</i> | 133         | 224 | 301 |
| <i>M20+34+44</i> | <i>M34</i> | 133         | 231 | 301 |
| <i>M20+35+00</i> | <i>M35</i> | 133         | 238 | -   |
| <i>M20+36+00</i> | <i>M36</i> | 133         | 245 | -   |
| <i>M20+37+00</i> | <i>M37</i> | 133         | 252 | -   |
| <i>M20+38+00</i> | <i>M38</i> | 133         | 259 | -   |

869

870



871 Table 2: Simulation parameters as used for the model extension and dispersal process of the large marsh grasshopper  
 872 (LMG). The first column gives the parameter name and the respective symbol applied in equations. Second and third  
 873 column contain the parameter's value and unit (if any). The fourth column gives a more detailed description of the  
 874 parameter.

| Parameter / State variable (symbol)         | Value   | Unit              | Description                                                                                                                  |
|---------------------------------------------|---------|-------------------|------------------------------------------------------------------------------------------------------------------------------|
| Dispersal radius ( $rad_{disp}$ )           | 1,500   | m                 | Home range of the LMG given by the maximum covered distance of an individual (Griffioen, 1996)                               |
| Base dispersal rate ( $rate_{disp}^{ima}$ ) | 0.00595 | day <sup>-1</sup> | Daily dispersal rate of the LMG determined by the farthest disperser found in a 'mark and recapture' study (Malkus, 1997)    |
| Dispersal preference ( $pref^{near}$ )      | 1.0     |                   | Preference of selecting a neighbor during the dispersal process, where higher values result in selection of closer neighbors |
| sight ( $sight_{disp}$ )                    | 0.5     |                   | Ability to find a selected neighbor during a dispersal process                                                               |
| Decay rate ( $dec_{disp}$ )                 | 0.04    |                   | Distance dependent probability to survive the dispersal process                                                              |
| Climate Cell size ( $size_{clim}$ )         | 12,000  | m                 | The size (width/height) of a square Climate Cell                                                                             |
| Grassland Cell size ( $size_{hab}$ )        | 250     | m                 | The size (width/height) of a square Grassland Cell (habitat)                                                                 |

875 Abbreviations: clim=climate, dec=decay, disp=dispersal, hab=habitat, ima=imago, pref=preference, rad=radius

876

877 **12 Figures**

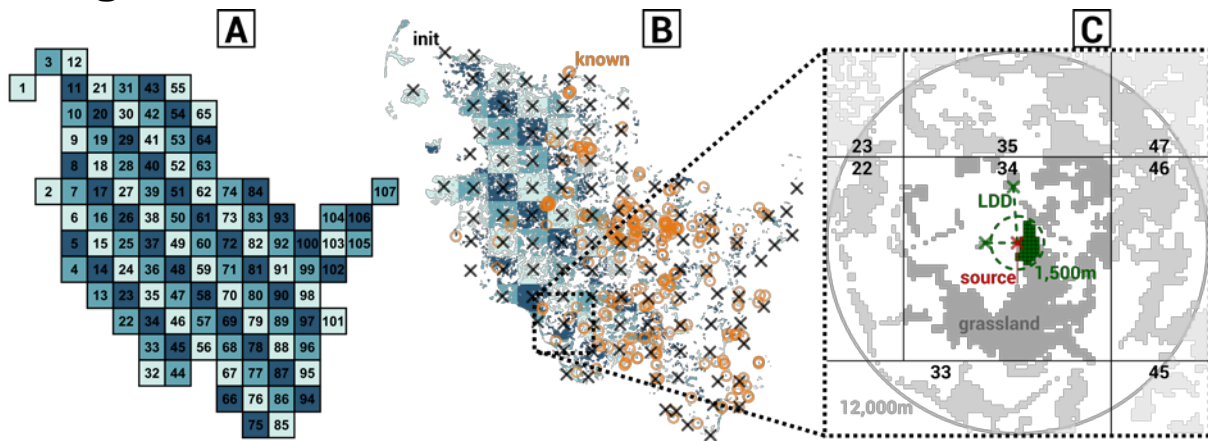

878

879 Figure 2: Distribution of 107 climate cells (A) and 72,929 grassland cells (B) in Schleswig-Holstein (SH), and grassland cells  
880 within a dispersal distance of > 12,000 m around the source habitat of a selected initial population (C). The numbers in A  
881 assign a unique ID to each climate cell. Turquoise colors in subplots A and B are used to highlight mapping of grassland  
882 cells to respective climate cells. In subplot B, black crosses mark the 107 initial populations that are closest to the  
883 respective climate cell's geometric center and orange circles known LMG locations in SH in the years 2000 to 2016. In  
884 subplot C, a red cross marks the source habitat of the initial population in climate cell 34. Green colors highlight  
885 grassland involved in dispersal: the dashed green circle around the source habitat represents the starting population's  
886 dispersal radius of 1,500 m; green cells are available grassland within this radius; and the two green crosses connected  
887 to the source habitat by dashed lines represent the habitats reached via long distance dispersal (LDD). LDD applies, if there  
888 are no cells within the 1,500m range of the source cell in either one of eight cardinal directions (North, Northeast, etc.).  
889 Grey cells depict the remaining grassland that can be reached over time through dispersal from cells other than the  
890 source habitat, where the shades of grey from dark to light represent: grassland within the source climate cell 34;  
891 grassland outside the source cell but within a 12,000 m dispersal distance; and grassland in a dispersal distance farther  
892 than 12,000 m. The four vertical and horizontal black lines delimit the source climate cell from its seven neighbors  
893 identified by black numbers. Note: here, there is no neighboring climate cell to the Southwest

894

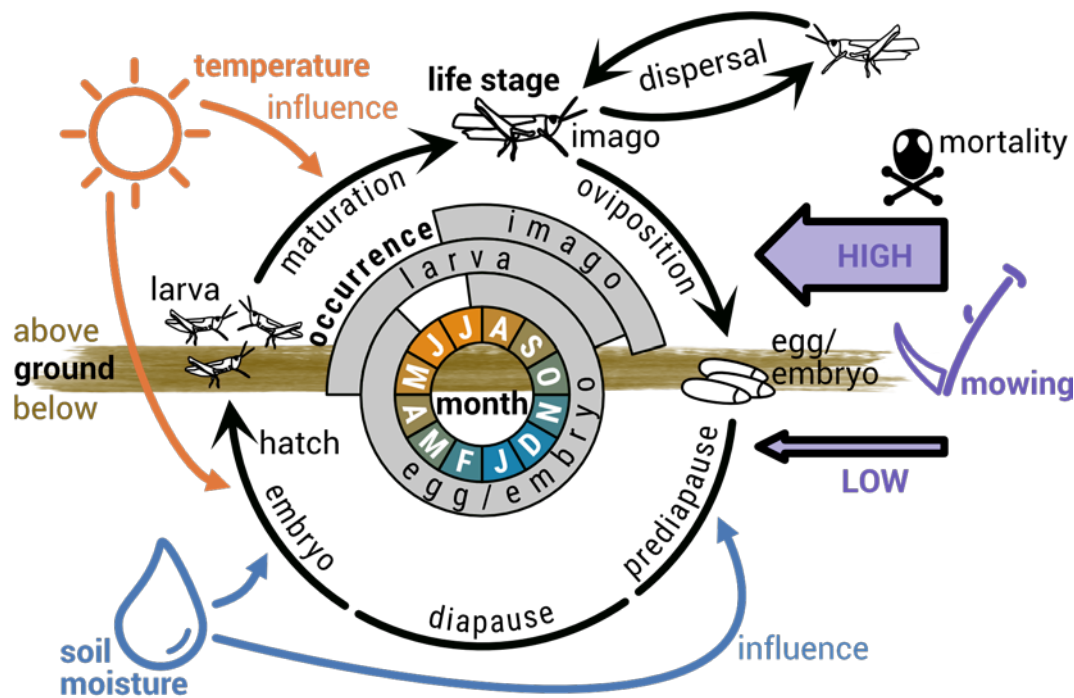

895

896 Figure 3: Yearly life cycle of the large marsh grasshopper, including the influence of external drivers. Black life stage  
 897 symbols and arrows represent processes between and during life stages, where the life stage 'egg/embryo' is subdivided  
 898 into three phases (broken arrow) and the dispersal process is directed to neighboring habitats. The typical ranges of the  
 899 life stage occurrences are indicated in grey. The inner circle depicts months, where the color indicates seasonal changes  
 900 in temperature. The influence of the external drivers of temperature, soil moisture and mowing is shown by colored  
 901 symbols and arrows. Mowing impact is distinguished into high (aboveground) and low (belowground) mortality

902

903

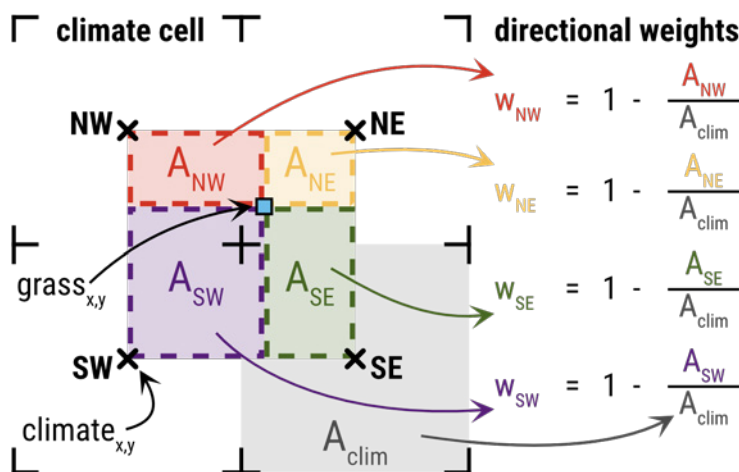

904

905 Figure 4: Calculation of the weights applied to bilinearly interpolate the climate values of four climate cells (black  
 906 crosses) to achieve a distinct value for a grassland cell (blue square) that is enclosed by the climate cells. These  
 907 directional weights are determined using the square area of a climate cell ( $A_{clim}$ , grey) and the rectangular directional  
 908 areas ( $A_{NW}$ , red;  $A_{NE}$ , yellow;  $A_{SE}$ , green;  $A_{SW}$ , purple) formed between the grassland cell coordinate and the center of the  
 909 respective climate cell in secondary cardinal direction (Northwest, NW; Northeast, NE; Southeast, SE; Southwest, SW).  
 910 Climate cells closer to the grassland cell result in smaller areas while receiving larger directional weights ( $w_{NW}$ ,  $w_{NE}$ ,  $w_{SE}$ ,  
 911  $w_{SW}$ ), which is accounted for by building the inverse of the ratio from directional area to climate cell area

## LDD grassland selection

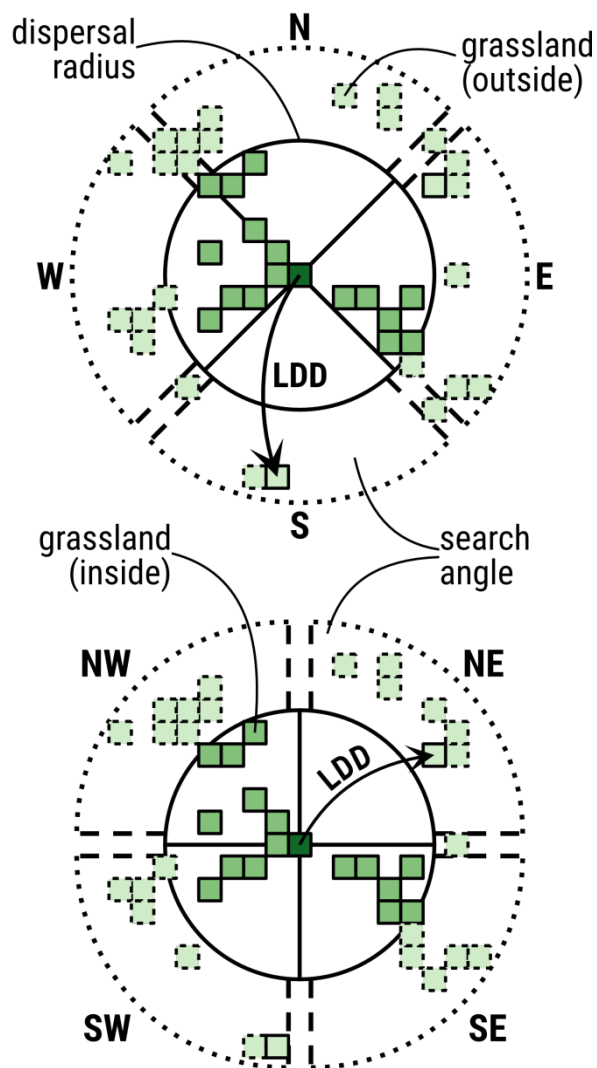

Figure 5: Determination of grassland cells for long distance dispersal (LDD) in cardinal (TOP) and secondary cardinal direction (BOTTOM) of a source habitat (dark green). The solid black circle encompasses grassland cells (medium green) within a defined dispersal radius. Light green cells represent grassland outside of the dispersal radius, where dashed cells are unreachable from the source habitat and solid cells are selected for LDD. Dashed black lines depict a direction's angle to search cells for LDD selection. Longer distances than indicated here are possible. Cells for LDD are only searched in case no grassland is found within the dispersal radius of either one of the directions. Cells in straight secondary cardinal or cardinal direction (spaces between parallel dashed lines) are ignored for the search in cardinal or straight cardinal direction, respectively

912

913

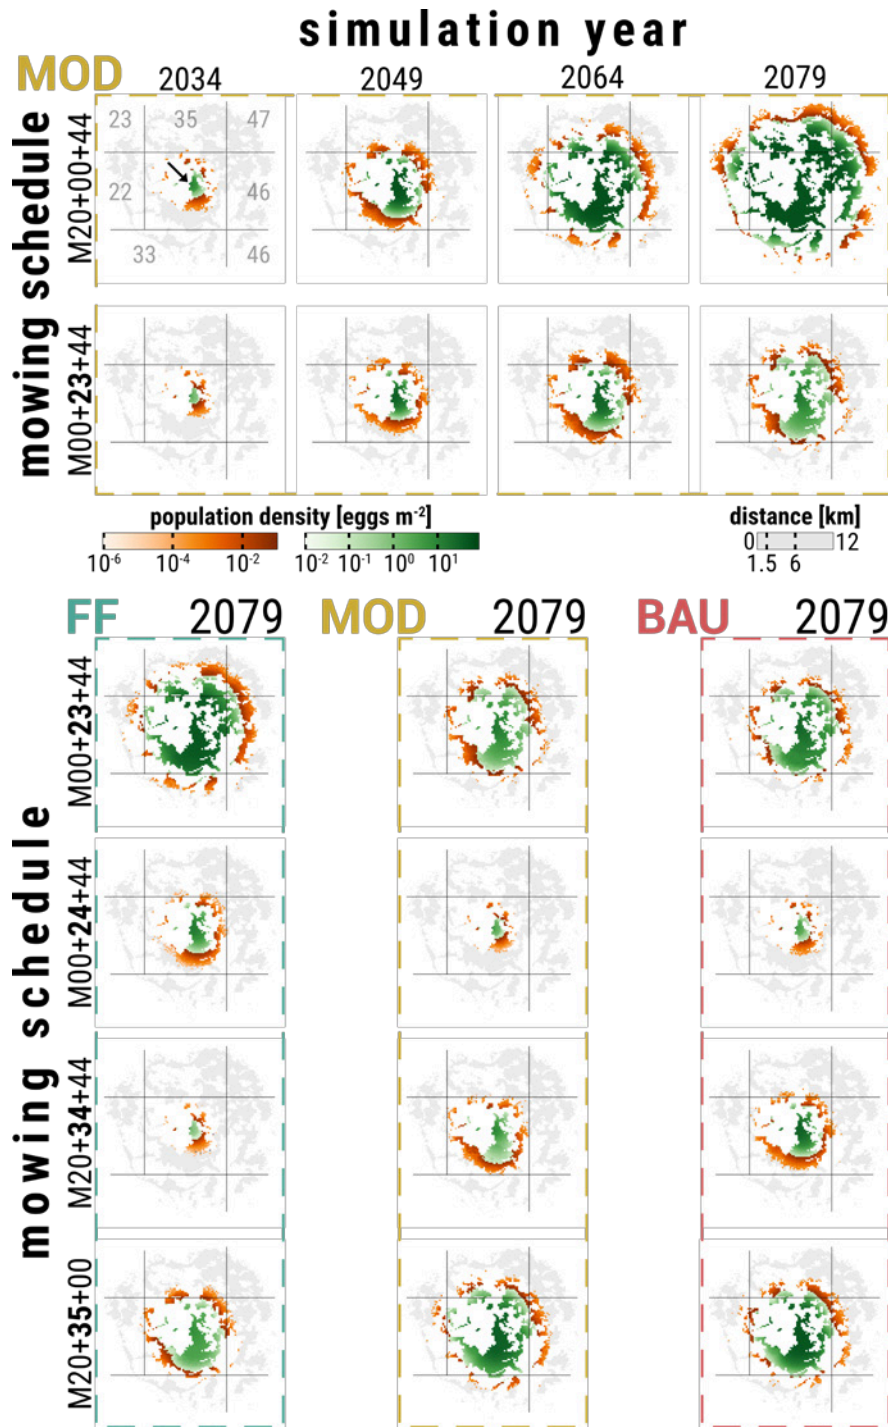

914

915 Figure 6: Spatial distribution of a LMG population dispersing from a singular source habitat in the center (black arrow in  
 916 top left subplot) of climate cell 34. Each colored cell within the 20 subplots represents the population density in eggs m<sup>-2</sup>  
 917 (mean over 10 replicates) in a 6.25 ha grassland habitat inside a 16 km radius of the source habitat at the end of a  
 918 simulation year. GREEN cells are considered habitats with an established LMG population, i.e., an imago life stage  
 919 density  $\geq 0.002$  individuals m<sup>-2</sup> during a simulation year; ORANGE cells represent unestablished populations at the cutting  
 920 edge of the dispersal process, i.e., a imago life stage density  $< 0.002$  individuals m<sup>-2</sup>; GREY cells are habitats that are  
 921 reachable at the end of the 60 year simulation time in case of ideal conditions with minimal disturbances (cf. top right  
 922 subplot); WHITE areas were either unreachable or do not qualify as grassland. The grey grid lines delineate the climate  
 923 cells from each other, where the grey numbers in the top left plot label the ID of the respective climate cell. The top two  
 924 rows show – from left to right – the chronological LMG distribution progress after 15, 30, 45 and 60 simulation years  
 925 exemplarily for the MOD climate change scenario (CCS), where the first row is the progress under ideal conditions  
 926 (extensive mowing) and the second row in an environment disturbed by mowing schedule M00+23+44 (mowing in  
 927 calendar week 23 instead of 20). Each of the 12 plots in the three bottom columns depict the LMG distribution at the end  
 928 of the final simulation year 2079 depending on the CCS FF (first column), MOD (second) and BAU (third) as well as the  
 929 applied mowing schedules M00+23+44 (first row), M00+24+44 (second), M20+34+44 (third) and M20+35+44 (last)



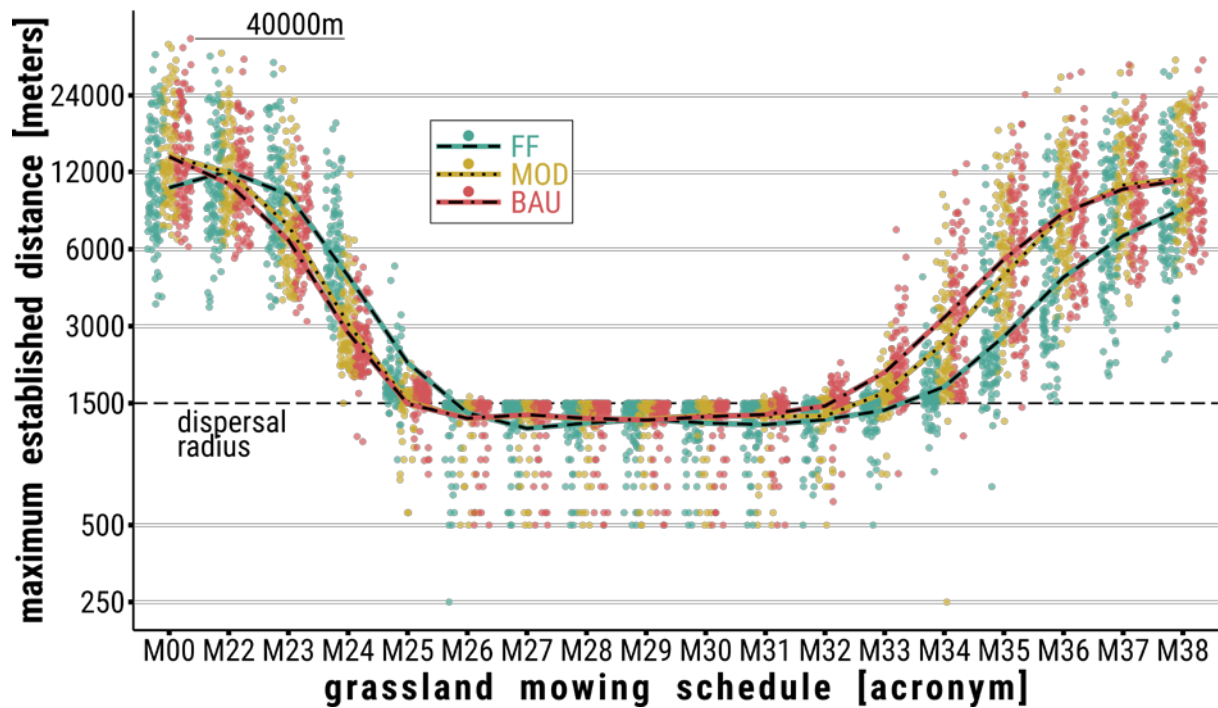

930

931 Figure 7: Distance in meters (y-axis) from a source habitat to the most distant established population in its neighborhood  
932 by the end of a simulation run in 2079 depending on mowing schedule (x-axis) and climate change scenario (CCS;  
933 green=FF, brown=MOD, pink=BAU). Each colored dot represents this distance value for either one of the 107 initial  
934 populations (or climate cells) averaged over ten replicates. The colored trend lines are distinguished by CCS and follow  
935 the mean for the distance value over the 107 cells in the study region depending on the applied mowing schedule. The  
936 black dashed line marks a distance of 1,500 m, i.e., the LMG dispersal radius and thus the usual home range threshold of  
937 the source habitat when ignoring potential long distance dispersal (LDD). Populations established directly through (LDD)  
938 from the source habitat were omitted in the calculating to avoid misleading maxima outside the dispersal radius

939

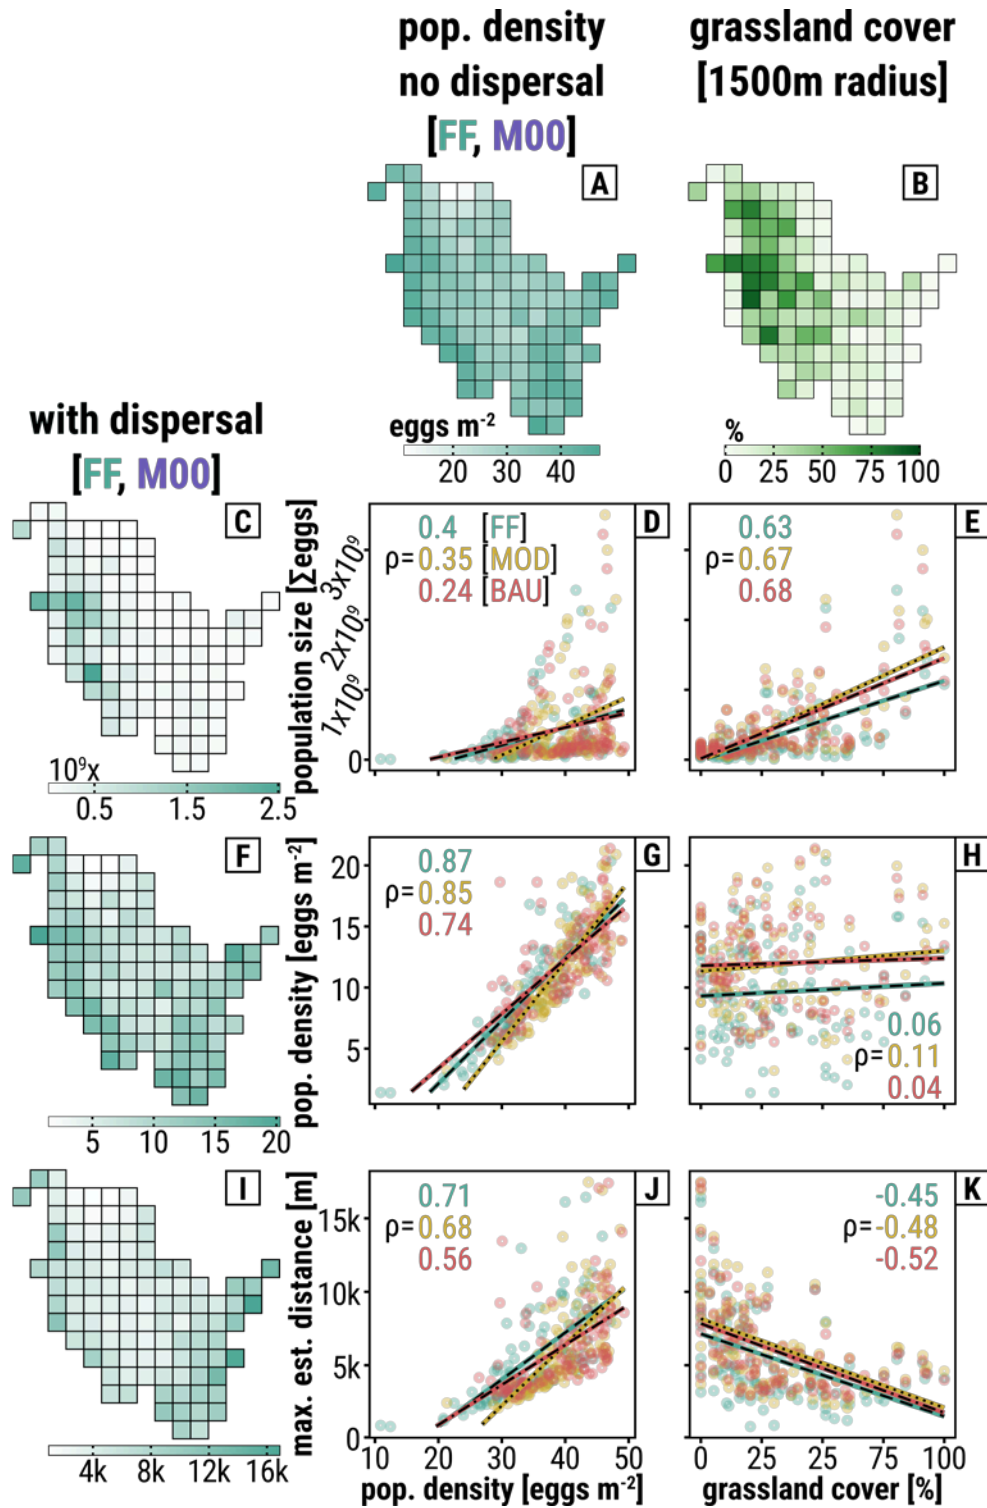

940

941 Figure 8: Spatial distribution of and correlation between evaluation parameters population size [Σ eggs], population  
 942 density [eggs m<sup>-2</sup>] and maximum established distance [meters] as well as regional grassland cover [in %]. Maps C, F and I  
 943 show the spatial distributions of the results stemming from simulations with dispersal - exemplary for the FF climate  
 944 change scenario (CCS), for simulations without dispersal (A) and the grassland cover in a radius ≤ 1,500 m of a respective  
 945 source habitat (B). Each of the 107 cells in subplots A, C, F and I represent INDEPENDENT simulation runs, or rather their  
 946 mean over 10 replicate runs (5 without dispersal), and depict the results of the dispersal process from a SINGLE initial  
 947 population in the center of a cell. The six scatter plots correlate the evaluation parameters in the first column with the  
 948 values in the first row for all three CCS FF (RCP 2.6, green color), MOD (RCP 4.5, brown) and BAU (RCP 8.5, pink). Each  
 949 colored dot marks the resulting values in one of the 107 source grid cells. The colored numbers give the correlation  
 950 coefficient  $\rho$  for the respective parameter combinations by CCS. The colored lines represent the respective linear  
 951 regression, where dashed=FF, dotted=MOD and dash dotted=BAU. Note that the maps are shown exemplarily only for  
 952 the FF scenario, as the qualitative outcome was similar for all three CCS

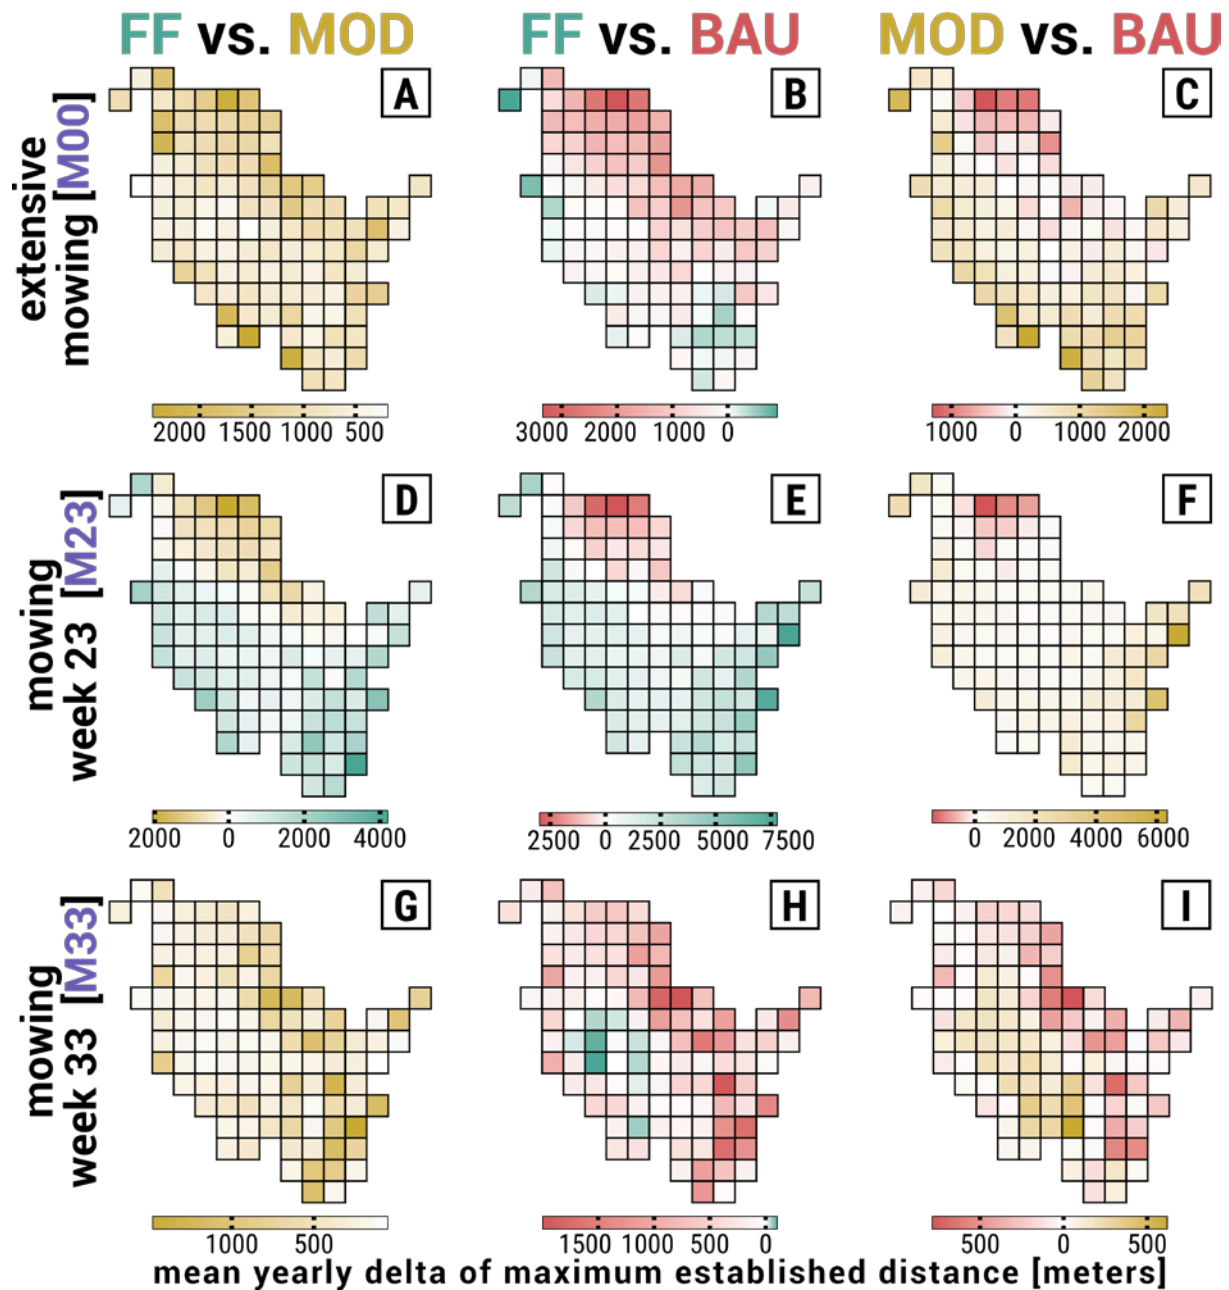

953

954 Figure 9: Difference (delta) in dispersal success in terms of mean population establishment distance [meters] between  
 955 climate change scenarios (CCS) depending on source habitat and mowing schedule. First column: FF vs. MOD, second: FF  
 956 vs. BAU, third: MOD vs. BAU. First row: reference scenarios with extensive mowing schedule M20+00+44 (M00), second  
 957 row: deviating early mowing schedule M00+23+44 (M23), third row: additional late mowing schedule M20+33+44 (M33).  
 958 Values were determined per replicate by subtracting the yearly established distance of the CCS mentioned second from  
 959 the CCS mentioned first in the header and then calculating the replicate mean of absolute delta. Each of the 107 cells per  
 960 subplot represent INDEPENDENT simulation runs, or rather their mean over 10 replicate runs, and depict the results of  
 961 the dispersal process from a SINGLE initial population in the center of a cell. The cells' background colors highlight which  
 962 of the respective CCS on average shows the higher differences during the 60 simulation years, where a LIGHTER color  
 963 represents lower average difference. GREEN cells are in favor of FF, BROWN cells in favor of MOD and PINK cells in favor  
 964 of BAU
